1 **Proteomics of broad deubiquitylase inhibition unmasks redundant enzyme function to re-**  
2 **veal substrates**

3 Valentina Rossio<sup>1</sup>, Joao A. Paulo<sup>1</sup>, Joel Chick<sup>2</sup> Bradley Brasher<sup>3</sup>, Steven P. Gygi<sup>1</sup>, Randall W.  
4 King<sup>1\*</sup>

5 <sup>1</sup> Department of Cell Biology, Blavatnik Institute at Harvard Medical School, Boston, MA 02115, USA.

6 <sup>2</sup> Present address: Vividion Therapeutics San Diego, CA 92121, USA.

7 <sup>3</sup> Boston Biochem, a Bio-Techne Brand, Cambridge, MA 02139, USA.

8 \*Correspondence to Randall W. King: [randy\\_king@hms.harvard.edu](mailto:randy_king@hms.harvard.edu)

9

10 **Abstract**

11 Deubiquitylating enzymes (DUBs) counteract ubiquitylation to control stability or activity of  
12 substrates. Identification of DUB substrates is challenging because multiple DUBs act on the  
13 same substrates, thwarting genetic approaches. Here, we circumvented redundancy by broadly  
14 inhibiting DUBs in *Xenopus* egg extract. DUB inhibition increases ubiquitylation of hundreds of  
15 proteins, depleting free ubiquitin without inducing widespread degradation. Restoring available  
16 ubiquitin led to proteasomal degradation of over thirty proteins, indicating that deubiquitylation  
17 is essential to maintain their stability. We confirmed their DUB-dependent stability with recom-  
18 binant human proteins, demonstrating evolutionary conservation. We profiled the ability of  
19 DUBs to rescue protein stability, and found that USP7 has a unique ability to broadly antagonize  
20 proteasomal degradation. Together, we provide a comprehensive characterization of ubiquitin  
21 dynamics in the *Xenopus* system, identify new DUB substrates, and present a new approach to  
22 characterize physiological DUB specificity that overcomes challenges posed by DUB redun-  
23 dancy

## 24 **Introduction**

25           Conjugation of ubiquitin to proteins is a widespread, highly regulated post-translational  
26 modification. The Ubiquitin-Proteasome System (UPS) is best known for its ability to target spe-  
27 cific proteins for degradation. Still, ubiquitylation also regulates protein localization, activity and  
28 function independently of degradation(Swatek and Komander 2016)(Hershko and Ciechanover A.  
29 1998)(Clague, Heride, and Urbé 2015). Ubiquitin can be incorporated in polyubiquitin chains of  
30 different topologies that may result in different fates(Komander and Rape 2012). For example,  
31 lysine-63 linked chains promote non-degradative functions (Jackson and Durocher  
32 2013)(Lauwers, Jacob, and André 2009), whereas lysine-48 linked chains and branched chains  
33 such as K11/K48 or K29/K48 promote proteasomal degradation(Chau et al. 1989). Ubiquitin is  
34 covalently attached to substrates via a cascade of E1-E2-E3 enzymes(Yihong Ye and Rape 2009).  
35 In contrast, deubiquitylating enzymes (DUBs) catalyze ubiquitin removal(Clague, Coulson, and  
36 Urbé 2012).

37           Comprehensive proteomic identification of physiological UPS substrates has been chal-  
38 lenging due to the prominence of protein-quality control pathways that ubiquitylate newly synthe-  
39 sized proteins that do not fold properly in growing cells(W. Kim et al. 2011). Therefore, it can be  
40 difficult to distinguish regulatory ubiquitylation of mature proteins from more widespread ubiq-  
41 uitylation that targets misfolded proteins for degradation during protein biogenesis. To overcome  
42 this challenge, in our study we took advantage of the *Xenopus laevis* egg extract model system.  
43 Since the mature *Xenopus* egg has completed its growth prior to being laid, there is little ongoing  
44 translation and protein folding, thereby minimizing the contribution of quality-control ubiquityla-  
45 tion compared to actively growing cultured cells. Thus, ubiquitylation events observed in these  
46 extracts are more likely to reflect physiologic regulatory events rather than quality control.

47 *Xenopus* egg extract can be prepared with little dilution of the cytoplasm, therefore preserving  
48 physiological integrity and enabling the reconstitution of complex biochemical processes such as  
49 DNA damage repair cell cycle progression and mitotic spindle formation (Yardimci et al.  
50 2012)(Glotzer, Murray, and Kirschner 1991)(Field and Mitchison 2018). *Xenopus* egg extract has  
51 been routinely used for studies of protein ubiquitylation and degradation, including studies of mi-  
52 totic cyclin degradation(Glotzer, Murray, and Kirschner 1991) as well as regulatory ubiquitylation  
53 during DNA replication(Yardimci et al. 2012). Together these studies indicate that ubiquitylation  
54 regulates important physiological processes in *Xenopus* egg extracts. Still, we have a limited un-  
55 derstanding of ubiquitin homeostasis and the overall dynamics of ubiquitylation, deubiquitylation,  
56 and protein degradation in this experimental system.

57         The human genome encodes approximately 100 DUBs, divided into two families: the zinc  
58 metalloprotease class (10 DUBs), and the cysteine-protease class that contains most other DUBs  
59 (~90)(Mevissen and Komander 2017)(Clague et al. 2013). A few DUBs have been well-studied  
60 with many characterized substrates, but most DUBs still do not have any known substrates, limit-  
61 ing our understanding of how DUB substrate specificity is achieved. DUB specificity is complex,  
62 as it can arise through binding specificity mediated by unique protein-protein interaction do-  
63 mains(Ma et al. 2010), or through recognition of specific topologies of ubiquitin chains(Bremm,  
64 Freund, and Komander 2010; Wang et al. 2009)(Flierman et al. 2016). Most DUB substrates have  
65 been discovered by first identifying proteins that interact with specific DUBs. This approach has  
66 been used globally(Sowa et al. 2009), but it may miss substrates that interact weakly with DUBs  
67 or identify regulators or scaffold proteins rather than true substrates. Identifying DUB targets is  
68 difficult because DUBs may function redundantly(Beckley et al. 2015)(Kwon, Saindane, and  
69 Baek 2017), and thus inactivating a single DUB may not destabilize its substrates or affect a



70 particular biological process. In the case of proteome stability, it is not known which DUBs have  
71 the broadest impact in rescuing proteins from proteasome degradation or to what extent DUBs act  
72 redundantly in this process. Therefore, new approaches are needed to identify physiological sub-  
73 strates of DUBs and to overcome the challenges posed by redundant function of these enzymes.

74 In this study we applied unbiased quantitative proteomic approaches to characterize the  
75 dynamics of ubiquitylation and proteasomal degradation in *Xenopus* egg extract. We found that  
76 the proteome is stable, despite widespread ubiquitylation, suggesting that most ubiquitylation is  
77 non-degradative. By broadly inhibiting cysteine-protease DUBs, we circumvented the possible  
78 effects of redundancy on proteome stability and discovered a set of proteins whose stability de-  
79 pends on DUB activity. We next took advantage of this panel of substrates to identify DUBs that  
80 are sufficient to counteract proteasomal degradation of these proteins. By broadly inactivating  
81 DUBs and adding back a panel of recombinant DUBs one by one, we unmasked DUB redundancy  
82 and discovered that USP7 can rescue many substrates from degradation. However, specific inhi-  
83 bition of USP7 with a small molecule inhibitor was not sufficient to promote degradation of most  
84 of the substrates we identified, suggesting that USP7 functions redundantly with other DUBs. Our  
85 work highlights the impact of DUB redundancy on proteome stability and reveals the specificity  
86 and activity of DUBs whose function would otherwise be masked by redundancy.

87 **Results**

88 **UbVS treatment induces rapid depletion of available ubiquitin and labels a broad set of cys-**  
89 **teine-protease DUBs in *Xenopus* extract**

90 To selectively inhibit cysteine protease DUBs in *Xenopus* extract, we used ubiquitin vinyl  
91 sulfone (UbVS), which covalently inhibits cysteine-protease DUBs, without inhibiting other cys-  
92 teine proteases or other classes of DUBs(Borodovsky et al. 2001). Our laboratory previously  
93 showed that UbVS treatment efficiently blocks ubiquitin recycling in *Xenopus* extract(Dimova et  
94 al. 2012). We confirmed that 10  $\mu$ M UbVS was sufficient to rapidly deplete free ubiquitin, (Fig.  
95 1a, 1b) which was associated with rapid discharge of the Ube2C-ubiquitin thioester within 5  
96 minutes (Fig. 1a, bottom). Other E2s were similarly rapidly discharged (data not shown). Addition  
97 of exogenous ubiquitin to UbVS-treated extract fully recharged the Ube2C thioester confirming  
98 that the E2's discharge was due to the depletion of free ubiquitin (Fig.1a, bottom). To determine  
99 the spectrum of cysteine-containing DUBs targeted by this concentration of UbVS, extract was  
100 treated with 10  $\mu$ M HA-tagged UbVS (HA-UbVS) and sensitive DUBs were visualized as discrete  
101 bands by anti-HA Western blotting analysis (Fig. 1b, right). To identify these DUBs, we per-  
102 formed mass spectrometry analysis of immunopurified HA-UbVS from extract and identified  
103 88 proteins (Table S2), 35 of which were cysteine-protease DUBs (Table S1, S2) that are likely  
104 direct targets of UbVS. All known classes of cysteine-protease DUBs were found (Fig. 1c, Table  
105 S1), whereas metallo-protease DUBs (JAMM) were not identified, as expected(Borodovsky et al.  
106 2001). Prior proteomic analysis of *Xenopus* extract detected 54 DUBs(Wühr et al. 2014) (Table  
107 S1), 51 of which were cysteine-proteases. Thus, 10  $\mu$ M HA-UbVS labeled 35 of 51 (69%) of  
108 cysteine-protease DUBs present in extract, consistent with broad specificity of UbVS for this class  
109 of DUBs(Borodovsky et al. 2001). The remaining DUBs were likely not identified either because

110 they were present in low abundance or because they do not react rapidly with UbVS. Our HA-  
111 UbVS pull-down also isolated proteins that are likely to strongly associate with DUBs (Table S2),  
112 as the pull-down was carried out in the presence of high salt (500 mM KCl). A high fraction of  
113 these proteins (31) are components of the proteasome, consistent with the known interaction of  
114 UbVS-sensitive DUBs UCHL5 and USP14(de Poot, Tian, and Finley 2017) with the proteasome.  
115 Other known interactors of DUBs that we isolated included GBP1/GBP2, which binds  
116 USP10(Soncini, Berdo, and Draetta 2001), and the SPATA proteins (SPATA2/SPATA2L), which  
117 have been identified as CYLD interactors(Sowa et al. 2009) in human cells (Table S2), suggesting  
118 evolutionary conservation of these interactions.

119

## 120 **UbVS treatment induces degradation of a limited set of proteins when available ubiquitin is** 121 **restored**

122 We first wanted to investigate how inhibition of multiple DUBs influenced proteome sta-  
123 bility in *Xenopus* extract. We hypothesized that simultaneous inhibition of 35 DUBs with UbVS  
124 might lead to destabilization of proteins that require ongoing deubiquitylation to maintain their  
125 stability. By simultaneously inhibiting a large number of DUBs, we predicted that we might be  
126 able to identify new substrates of DUBs, including substrates whose stability is conferred by the  
127 action of redundant DUBs. We used a multiplexed Tandem Mass Tag (TMT)-based quantitative  
128 proteomic approach(Navarrete-Perea et al. 2018) (Fig. 1d), and we measured protein abundance  
129 over time in untreated extract, as well as extract to which ubiquitin, UbVS, or the combination  
130 (UbVS/ubiquitin) were added (Fig. 1e). We reasoned that proteins that decreased specifically in  
131 the presence of UbVS and/or UbVS/ubiquitin may normally be protected from degradation by  
132 UbVS-sensitive DUBs. We performed two independent experiments using *Xenopus* extract

133 prepared from two sets of eggs (collected from different animals and processed separately), to  
134 ensure reproducibility. In each experiment we quantified around 8000 proteins, with an overlap of  
135 94.8% between the two experiments.

136 First, we observed that in the absence of any perturbation, the proteome was stable in  
137 *Xenopus* extract over the course of 60 minutes. Few proteins changed in abundance over time, and  
138 those that did were not shared between the experiments (Fig. S1a). This degree of proteome  
139 stability is consistent with the idea that bulk rates of translation are relatively quiescent in the  
140 *Xenopus* system (Richter and Smith n.d.) and that the extract was treated with cycloheximide to  
141 prevent protein synthesis and mitotic entry. Proteome stability in untreated extract was not a con-  
142 sequence of limiting ubiquitin availability because addition of exogenous ubiquitin alone did not  
143 stimulate protein degradation (Fig. S1a). With the exception of ubiquitin, which was added to the  
144 extract, we did not observe any proteins that increased in abundance (Fig. S1a) in both the  
145 experiments. Addition of UbVS alone also had no measurable effect on protein stability, possibly  
146 due to depletion of available ubiquitin (Fig. S1a). However, addition of UbVS together with ubiq-  
147 uitin (UbVS/ubiquitin) induced degradation of 34 proteins, as defined by a reduction in their abun-  
148 dance by at least 1.5-fold in both experiments (Fig. 1f, g). Choosing a more relaxed threshold based  
149 on the 5% of proteins whose abundance decreased most in UbVS/ubiquitin (FDR 1%) revealed  
150 additional proteins that decreased in both experiments (Fig. S4a). Because transcription and trans-  
151 lation were inactive in extract, the decrease in protein abundance of this specific set of proteins  
152 was likely a consequence of protein degradation that occurred as a direct consequence of DUB  
153 inhibition. Thus, these proteins represent putative DUB substrates that are protected from degra-  
154 dation by UbVS-sensitive DUBs.

155 Because only a limited number of proteins were destabilized by the addition of 10  $\mu$ M

156 UbVS/ubiquitin, we tested whether stronger inhibition of UbVS-sensitive DUBs, by addition of a  
157 higher concentration of UbVS, led to destabilization of a larger number of proteins. We compared  
158 protein stability in untreated extract and in extract co-treated with ubiquitin and 10  $\mu$ M (as in the  
159 previous experiments) or 30  $\mu$ M UbVS (Fig. S2a) using TMT-based quantitative proteomics as  
160 before. We confirmed the degradation of the proteins observed previously using 10  $\mu$ M UbVS, but  
161 we did not observe an increase in the number of proteins degraded in the presence of 30  $\mu$ M UbVS  
162 (Fig. S2b). On the contrary, the proteins decreasing in 10  $\mu$ M UbVS were more stable at the higher  
163 UbVS concentration (Fig. S2b, S2c). This finding suggested that addition of a higher concentration  
164 of UbVS might lead to faster ubiquitin depletion, thereby hampering the ability of UbVS to stim-  
165 ulate protein degradation. To test this hypothesis, we monitored the discharge rate of the E2-Ub  
166 thioester after ubiquitin addition to extract pre-treated with increasing concentrations of UbVS.  
167 Whereas addition of 50  $\mu$ M ubiquitin was sufficient to completely sustain Ube2C charging for 30  
168 minutes in extract treated with 10  $\mu$ M UbVS, this concentration of ubiquitin was insufficient to  
169 maintain charged Ube2C in extract treated with 30  $\mu$ M UbVS (Fig. S2d). Thus, we cannot drive  
170 broader protein instability by stronger DUB inhibition because ubiquitin becomes depleted too  
171 rapidly.

## 172 **Non-degradative ubiquitylation targets a large number of proteins in *Xenopus* egg extract**

173 Since addition of UbVS causes rapid depletion of available ubiquitin and discharge of E2  
174 enzymes (Fig.1a, b), the ubiquitin conjugation machinery must be active in *Xenopus* extract. We  
175 were therefore surprised by the fact that addition of ubiquitin or UbVS alone did not stimulate  
176 protein degradation (Fig.S1a) and that UbVS/ubiquitin promoted degradation of only a limited set  
177 of proteins (Fig.1g). These findings may be explained by the prevalence of non-degradative

178 ubiquitin conjugation pathways that preferentially consume ubiquitin, limiting ubiquitylation of  
179 degradative substrates. To acquire a better picture of the spectrum of proteins that are ubiquitylated  
180 in extract, we performed a proteomic experiment to identify proteins that become modified with  
181 exogenously added ubiquitin. We treated the extract with 50  $\mu$ M of HA-ubiquitin or buffer for 30  
182 minutes to allow the incorporation of HA-ubiquitin into ubiquitylated substrates. Immunoblot re-  
183 vealed incorporation of tagged ubiquitin into many proteins (Fig. S3a). We then performed mass  
184 spectrometry analysis of immunopurified HA-ubiquitin from extract and identified 772 proteins  
185 that were enriched for binding to HA-antibody beads relative to empty beads ( $\log_2$  anti-HA beads  
186 relative to empty beads) $> 1$ ,  $p$ -value  $< 0.05$ ) (Fig.S3b). Because this pull-down was carried out in  
187 the presence of high salt (500 mM KCl), these proteins are likely either directly ubiquitylated or  
188 bind ubiquitin with high affinity. The top proteins enriched on the anti-HA beads were UPS com-  
189 ponents such as E1s, E2s and ubiquitin ligases (Fig. S3B) that can form a thioester with HA-ubiq-  
190 uitin, confirming the validity of this approach. Beyond ubiquitylation machinery, proteins involved  
191 in translation, such as ribosomes, translation factors and RNA binding proteins, were the most  
192 frequently identified. Other proteins isolated included protein folding factors, cytoskeletal compo-  
193 nents, proteins involved in DNA replication/repair, mitochondrial proteins, and metabolic en-  
194 zymes. We also identified 9 of the 34 proteins degraded in extract treated with UbVS/ubiquitin,  
195 confirming that these proteins are directly ubiquitylated in extract. Thus, while the proteome is  
196 stable in untreated extract, the ubiquitin conjugation machinery appears highly active in its ability  
197 to modify a large number of proteins with ubiquitin in a manner that does not impact their stability.  
198 Therefore, the failure of ubiquitin addition to stimulate widespread degradation (Fig.S1a) may be  
199 a result of the preferential incorporation into non-degradative substrates.

200 Together our findings suggest that UbVS treatment induces rapid ubiquitin depletion

201 principally by promoting ubiquitylation of non-degradative substrates. To identify proteins that  
202 become preferentially ubiquitylated in the presence of UbVS, we profiled global protein ubiq-  
203 uitylation in extract using a multiplexed quantitative di-glycine (diGly) remnant method(Rose et  
204 al. 2016) after addition of ubiquitin or UbVS/ubiquitin to the extract for 30 minutes. Overall, we  
205 identified 883 ubiquitylation sites in 515 proteins, 219 of which were found in the previous HA-  
206 ubiquitin pull down experiment (Fig. S3c), indicating substantial overlap with the two different  
207 approaches. We identified 190 ubiquitylation sites (142 proteins) whose ubiquitylation increased  
208 significantly after UbVS/ubiquitin addition compared to addition of ubiquitin alone ( $\log_2$  Fold  
209 change>1) (Fig.S3d). As expected, we found 8 ubiquitylation sites belonging to 6 proteins of the  
210 34 that were destabilized by UbVS/ubiquitin addition to the extract (Fig. S3e), confirming again  
211 that these proteins are direct DUB substrates. Several proteins identified have been previously  
212 reported to be DUB substrates, such as the ESCRT complex component CHMP1B (USP8)(Cre-  
213 spo-Yañez et al. 2018), the ubiquitin ligase SMURF2 (USP15)(Iyengar et al. 2015) and the repli-  
214 cation factor PCNA (USP1)(Huang et al. 2006). However, the majority of the UbVS-sensitive sites  
215 are novel. Because UbVS treatment increases ubiquitylation of a much larger number of proteins  
216 than those that are destabilized, including abundant proteins such ribosome subunits and histones  
217 , these substrates may sequester ubiquitin, limiting protein degradation in extract treated with  
218 UbVS alone.

### 219 **Confirmation of UbVS-dependent proteasomal degradation of the newly identified sub-** 220 **strates with human orthologs**

221 After developing a clearer picture of the overall dynamics of ubiquitylation, deubiquityla-  
222 tion, and protein degradation in extract, we next focused on the 34 substrates that require UbVS-  
223 sensitive DUBs to maintain their stability. Most of these proteins have reported physiological

224 functions, but only 9 are known UPS substrates (Fig. 2a, Fig. S4a, Table S3). Furthermore, for  
225 only four of them have specific DUBs been identified that control their stability. Two of these  
226 proteins are ubiquitin ligases, MARCH7 and BIRC3, which are known to be protected from deg-  
227 radation by cysteine-protease DUBs in human cells (by USP7 or USP9(Nathan et al. 2008) and  
228 USP19 respectively(Mei et al. 2011)). In addition, we identified Stam and NFX1, which are known  
229 to be deubiquitylated by the cysteine-protease DUBs USP8(Berlin, Schwartz, and Nash 2010) and  
230 USP9 respectively(Chen et al. 2019). The ability of our screen to identify known DUB substrates  
231 suggests that our approach is capable of identifying physiologically relevant proteins whose sta-  
232 bility requires DUB activity.

233 For the majority of the proteins we identified, DUBs have not been implicated in regulation  
234 of their stability. We identified four additional ubiquitin ligases (MKRN1, RNF138, ZNF598,  
235 UBOX5), whose stability is not known to be dependent on DUB activity. This enrichment for  
236 ubiquitin ligases is again consistent with the fact that DUBs are known to protect them from auto-  
237 ubiquitylation and consequent degradation(W. Kim et al. 2011)(Ventii and Wilkinson 2008).  
238 Other functional classes of proteins that we identified included transcriptional regulators (GTSF1,  
239 SOX3, SOX15, TGIF2), signaling proteins (GYGif1, PLK3, WEE2, CSNK1E, BORA, PIM3),  
240 cytoskeletal regulators (CRIPT, WASL, KIAA1430, HN1, ARHGEF19), proteins involved in  
241 RNA processing (FAM32, RNASEH1, RBM18, SYF2, ZMAT22, ZFP36L11, EIF1), DNA dam-  
242 age components (ETAA1, SPRTN), a lipid storage protein (PLIN2), and an uncharacterized pro-  
243 tein (C6ORF132). Together these findings suggest that ongoing deubiquitylation in the *Xenopus*  
244 system is important for maintaining the stability of proteins that regulate a wide variety of biolog-  
245 ical processes.



246 We looked for possible characteristics sequence of these substrates (Table S3) that could  
247 contribute to their recognition by the UPS. Consistent with the PEST sequence(Rechsteiner and  
248 Rogers 1996) being a signal that promotes ubiquitin and proteasome-dependent degradation, we  
249 found one or multiple PEST sequences in 13 of the 34 hits (Table S3). Because efficient protein  
250 degradation by the proteasome requires unstructured regions in its substrates(Aufderheide et al.  
251 2015), we analyzed their sequences using ProViz(Jehl et al. 2016). We found that 8 substrates  
252 were predicted to be completely or highly disordered whereas 25 had significantly disordered re-  
253 gions consistent with the possibility that they are proteasome substrates (Table S3).

254 To directly test whether degradation of the identified DUB substrates was proteasome-  
255 dependent, we quantified protein stability in extract treated with UbVS/ubiquitin in the presence  
256 of the proteasome inhibitor MG262 or DMSO (as a control) with a TMT-based quantitative pro-  
257 teomics experiment (Fig. S5a, S5b). We found that 19 proteins became unstable after UbVS/ubiq-  
258 uitin addition (Fig. S5b, S5c), 14 of which were among the 34 substrates identified (Fig. 1g). All  
259 of these proteins were stabilized by proteasome inhibition (Fig. S5b, c). Thus, UbVS-sensitive  
260 DUBs antagonize proteasome-mediated degradation of these proteins.

261 To verify the findings of the proteomic experiments and directly test whether these proteins  
262 become destabilized by DUB inhibition, we expressed 13 candidate substrates in rabbit reticulo-  
263 cyte lysate and labeled them with <sup>35</sup>S-methionine. We chose ten proteins from our list of 34 can-  
264 didates, as well as three proteins that were destabilized in at least one of the two experiments shown  
265 in Fig.1f. We translated *in vitro* human orthologs, with the exception of PIM3, where we tested  
266 the *Xenopus* protein. Subsequently, we added the translated proteins to untreated extract or to ex-  
267 tract pre-treated with ubiquitin, UbVS or UbVS/ubiquitin and monitored their stability over time.  
268 We found that 12 of 13 proteins were degraded in the presence of UbVS/ubiquitin but were stable

269 in the other conditions (Fig. 2b, 2c, S4b-d), showing the same pattern that we observed for the  
270 endogenous counterparts. STAM was the only protein that was not destabilized in the presence of  
271 UbVS/ubiquitin, but instead showed strong poly-ubiquitylation (Fig. 2d). As a control, two pro-  
272 teins that were stable in the proteomic experiments (KPNA2 and HSPA8), were also tested and  
273 found to be stable when assayed by this approach (Fig. 2b, 2c) Thus, because we could recapitulate  
274 the behaviour of the endogenous *Xenopus* proteins using human orthologs, the DUB-dependent  
275 regulation of these proteins is likely conserved, as is known already for MARCH7, BIRC3, NFX1  
276 and STAM.

### 277 **Identification of DUBs sufficient to rescue proteins from degradation in UbVS/ubiquitin-** 278 **treated extract**

279 Next, we used these substrates to investigate the role of cysteine-protease DUBs in coun-  
280 teracting their proteasomal degradation. If the proteins degraded in UbVS/ubiquitin-treated extract  
281 are true DUB substrates, addition of recombinant DUBs to the extract should be able to rescue  
282 their degradation. Furthermore, by testing the sufficiency of each DUB to rescue degradation of  
283 these substrates, we can evaluate the activity and specificity of each DUB, even if they normally  
284 function redundantly. We reasoned that the DUBs efficiently targeted by UbVS were most likely  
285 to rescue the stability of the proteins degraded. Thus, we measured the fraction of each DUB la-  
286 beled by UbVS. After we treated the extract with 10  $\mu$ M HA-UbVS, we subsequently depleted all  
287 the HA-UbVS (and associated proteins) from the extract by immunodepletion with anti-HA anti-  
288 bodies coupled to beads. Using TMT-based quantitative proteomics, we compared the proteins  
289 remaining in extract after immunodepletion of HA-UbVS to the proteins present in extract after  
290 incubation with empty beads. As expected, the proteins depleted were mostly DUBs (Fig. S6a).  
291 We detected 32 cysteine-protease DUBs in undepleted extract and found that 25 of them were

292 depleted by HA-UbVS (Fig. 3a), with 19 DUBs being depleted by at least 30%. There was no clear  
293 correlation between the reported abundance(Wühr et al. 2014) of the DUBs (Table S1) and their  
294 fractional depletion by HA-UbVS (Fig. 3a). We selected 12 DUBs that were depleted at least 30%  
295 to test if they could rescue substrate degradation in UbVS/ubiquitin treated extract (Fig.3a, in  
296 bold). In addition, we tested USP14 because it can rescue several substrates from proteasomal  
297 degradation(B.-H. Lee et al. 2010a), as well as USP21 because it is a highly active DUB widely  
298 used in in vitro assays.

299 First, we confirmed the activity of each recombinant DUB with a UbVS-reactivity assay  
300 (Fig. S6b, c). All DUBs tested showed almost complete labelling with UbVS, with the exception  
301 of USP14 that requires activation by the proteasome(B.-H. Lee et al. 2010a; Borodovsky et al.  
302 2001), which was absent from these in vitro assays. We then proceeded to add each recombinant  
303 DUB to extract pre-treated with UbVS/ubiquitin and monitored the stability of <sup>35</sup>S-methionine-  
304 labeled ING2, CSNK1E, and CRIPT (Fig.3b). We chose these proteins as model substrates be-  
305 cause they have not been reported to be regulated by DUBs and they have unrelated functions. We  
306 began by assessing all DUBs at the same concentration (800 nM), which is substantially greater  
307 than the endogenous concentration for ten of the fourteen DUBs tested (Fig. S7a). We compared  
308 the ability of each DUB to rescue degradation of the selected substrates, creating a “DUB profile”  
309 that reports the percentage of substrate rescued by each DUB (Fig. 3b). We observed that only  
310 USP7, USP15, USP25 and USP28 could rescue degradation of these substrates (Fig. 3b, Fig. S7b).  
311 Whereas USP28 and USP15 are present at low concentration in extract (4 and 20 nM respectively),  
312 USP25 was not detected in the previous study indicating that its concentration is very low, so its  
313 activity was not further evaluated. USP7 is much more abundant in extract (150 nM), suggesting  
314 that it might be able to rescue degradation of these substrates at its physiological concentration. In

315 fact, when tested at physiological concentrations, USP7 remained capable of strongly rescuing  
316 CRIPT stability, with partial rescue of ING2 stability (Fig.3c, S7c). In contrast, USP15 and USP28  
317 did not rescue substrate degradation when used at lower concentrations, even though these ex-  
318 ceeded their endogenous concentrations by 5- to 15-fold, respectively (Fig. 3c, S7c). Therefore,  
319 among all the DUBs screened, USP7 seemed unique in its ability to rescue degradation of the  
320 substrates when tested at its physiological concentration. In contrast, USP4, USP9X, OTUD3,  
321 USP8, USP10, and USP21 did not rescue degradation of the three substrates, even though they  
322 were tested well above their endogenous concentrations. We were puzzled by the fact that the two  
323 known proteasome associated DUBs, UCHL5 and USP14, did not affect degradation of the sub-  
324 strates tested. Because they are very abundant in extract, we retested them and we tested UCHL3,  
325 another very abundant DUB in extract, at 5 times their endogenous concentration and we compared  
326 them to USP7. None of these DUBs had an effect comparable to USP7 in this assay (Fig. 3d, S7d).

327         Because USP7, USP15, USP25, and USP28 were each sufficient to stabilize all three sub-  
328 strates when used at 800 nM concentration, we wondered whether these DUBs were also capable  
329 of restoring ubiquitin availability in UbVS-treated extracts. We treated extract with 10  $\mu$ M UbVS,  
330 added each of the recombinant DUBs and monitored the charging status of Ube2C-Ub thioester as  
331 a readout of ubiquitin availability. We included USP21 as a positive control, as it broadly deubiq-  
332 uitylates substrates *in vitro*, as well as USP5, which can regenerate free ubiquitin by acting on  
333 unanchored ubiquitin chains(Hadari et al. 1992). As expected, addition of exogenous ubiquitin  
334 fully restored charging of the Ube2C-Ub thioester (Fig.3e), as did addition of USP21, consistent  
335 with its known broad substrate specificity. USP5 did not have any effect, suggesting that free  
336 unanchored ubiquitin chains are not generated at high levels in UbVS-treated extract. Of the 4  
337 DUBs able to rescue substrate degradation, only USP15 was able to fully restore charging of

338 Ube2C. This finding suggests that USP7, USP25, and USP28 are capable of rescuing substrate  
339 degradation without impacting ubiquitin availability in the extract, whereas USP15 seems to have  
340 a different substrate specificity that allows it to rescue degradation and also restore ubiquitin recy-  
341 cling. On the other hand, despite the ability of USP21 to regenerate free ubiquitin, it is unable to  
342 rescue the degradation of any of the tested substrates.

### 343 **USP7 broadly rescues protein degradation in UbVS/ubiquitin treated extract**

344 As USP7 seemed to be the most efficient DUB in rescuing degradation of the substrates  
345 tested, we decided to investigate how broad an effect USP7 had in rescuing proteins from degra-  
346 dation in extract treated with UbVS/ubiquitin. We performed a TMT-based quantitative prote-  
347 omics experiment comparing protein stability in extract treated with UbVS/ubiquitin, and in ex-  
348 tract in which USP7, USP9X, or USP4 were added at 800 nM each (Fig. 4a). We tested USP9X  
349 and USP4 as they were targets of HA-UbVS (Fig. 3a) yet were not sufficient to rescue the degra-  
350 dation of the panel of substrates that we tested (Fig 3b). We found that USP7 could rescue 16 of  
351 the 20 proteins degraded in UbVS/ubiquitin (Fig. 4c). However, we did not find any protein stabi-  
352 lized by addition of USP4 or USP9X (Fig.4b, 4c), consistent with the results of our earlier screen  
353 using the panel of <sup>35</sup>S-labeled substrates. The fact that human recombinant USP7 can stabilize  
354 endogenous *Xenopus* proteins suggests again that DUB-dependent regulation of the stability of  
355 these proteins is likely evolutionarily conserved.

356 Because USP7 broadly rescued substrate degradation in UbVS/ubiquitin-treated extract (Fig. 4b,  
357 4c) and has been reported to be associated with the proteasome(Bousquet-Dubouch et al. 2009;  
358 Besche et al. 2009), USP7 might inhibit the proteasome independent of its catalytic activity, as is  
359 known for USP14(B.-H. Lee et al. 2010a). Thus, we tested if the catalytic activity of USP7 was

360 required for substrate rescue. Pre-incubation of USP7 with UbVS inhibited rescue of substrate  
361 degradation (Fig. 4d), confirming that deubiquitylating activity of USP7 is required for the rescue.  
362 Second, we investigated if USP7 could inhibit degradation of other known proteasome substrates.  
363 We tested if USP7 can rescue the APC substrates cyclin B1 and securin from proteasome degra-  
364 dation. Surprisingly, we found that USP7 was unable to rescue them from degradation (Fig. 4e),  
365 indicating that USP7 does not generally inhibit the degradation of all substrates of the UPS.

366 **Inhibition of Usp7 is not sufficient to induce protein instability suggesting that DUBs func-**  
367 **tion redundantly to control protein stability in extract**

368 Because USP7 could stabilize most of the proteins degraded in extracts treated with  
369 UbVS/ubiquitin, we tested if inactivation of USP7 using the recently developed specific inhibitor  
370 XL-188(Lamberto et al. 2017) was sufficient to induce degradation of the substrates that we iden-  
371 tified. We also tested the effect of USP14 inhibition on proteome stability using the specific inhib-  
372 itor IU-47(Boselli et al. 2017) alone or in combination with XL-188, since USP14 inactivation  
373 promotes degradation of some proteasome substrates in vitro and in human cells(B.-H. Lee et al.  
374 2010b). First, we verified these compounds were able to inhibit the endogenous *Xenopus* DUBs.  
375 We pre-incubated extract with the active compounds (IU-47 and XL-188) and the respective inac-  
376 tive derivatives (IU-C and XL-203) for 30 minutes, and then added 10  $\mu$ M HA-UbVS. As ex-  
377 pected, only the active compounds were able to prevent HA-UbVS labelling of the specific tar-  
378 geted DUB (Fig. S8a). After we verified that the inhibitors were working in extract, we compared  
379 protein stability in extract pre-treated with 10  $\mu$ M UbVS, 100  $\mu$ M IU-47 (USP14i), 200  $\mu$ M XL-  
380 188 (USP7i) or the combination of the latter inhibitors, with TMT-based quantitative proteomics  
381 (Fig. S8b). In all conditions we added ubiquitin to minimize any impact of DUB inhibition on  
382 ubiquitin recycling. In this experiment, we confirmed again that 14 of the 34 candidates (Fig. S8c)

383 were degraded in UbVS/ubiquitin treated extract. Among these proteins, only HN1 was destabi-  
384 lized after specific USP7 inhibition. There were no other proteins (detected with more than one  
385 peptide) that were destabilized following specific USP7 inhibition. Inhibition of USP14 did not  
386 promote protein instability in *Xenopus* extract, as none of the proteins degraded in UbVS/ubiquitin,  
387 or any other protein, was degraded in IU-47-treated extract (Fig. S8c, d). Inhibition of both DUBs,  
388 as expected, caused the degradation of HN1 that was destabilized by the USP7 inhibitor. In addi-  
389 tion, we observed degradation of three other proteins: DBN1, KHL1, and Supervillin (SVIL), a  
390 known USP7 substrate (Fang and Luna 2013) (Fig. S8c, bottom). Together these findings suggest  
391 that inhibition of USP7 alone or in combination with USP14 is not sufficient to drive the broader  
392 pattern of protein instability that we observe in extracts treated with UbVS/ubiquitin. Instead, our  
393 results support a model in which multiple DUBs play redundant functions in maintaining stability  
394 of these substrates.

## 395 **Discussion**

396 Our study offers the first broad picture of the dynamics of ubiquitylation, deubiquitylation,  
397 and protein degradation in *Xenopus* extract, a model system that has been used extensively to study  
398 the ubiquitylation and degradation of specific substrates. We provide important new insights into  
399 the relative roles of UbVS-sensitive DUBs in recycling ubiquitin and in protecting proteome sta-  
400 bility. Identifying DUB substrates is challenging due to the fact that multiple DUBs can act redun-  
401 dantly on the same substrates. Here, by broadly inactivating DUBs we circumvented DUB redun-  
402 dancy and, using an integrated set of unbiased proteomic experiments, we identified both degra-  
403 dative and non-degradative targets of DUBs. Using these newly discovered set of physiological sub-  
404 strates whose stability is DUB-dependent, we investigated the ability of a panel specific DUBs to  
405 protect substrates from degradation. We revealed that USP7 was uniquely capable of rescuing most  
406 proteins from degradation in extract in which DUBs were broadly inhibited. However, since inhi-  
407 bition of USP7 alone was not sufficient to promote substrate degradation, our findings suggest that  
408 USP7 functions redundantly with other DUBs. In summary, our study provides the first compre-  
409 hensive characterization of protein stability and ubiquitin dynamics in *Xenopus* extract, reveals  
410 novel DUB substrates and presents a new approach to characterize DUB specificity.

411 By analyzing protein abundance over time in interphase *Xenopus* extract, we observed that  
412 the flux of proteins targeted to the proteasome is low and remarkably resistant to UPS perturbation.  
413 Untreated extract showed little change in protein abundance in the absence of protein synthesis,  
414 indicating that the proteome is stable. This degree of proteome stability is consistent with the fact  
415 that the *Xenopus* egg has completed its growth and sits in a quiescent state until fertilization. Yet  
416 at the same time, ubiquitylation and deubiquitylation appear to be highly active. Our findings sug-  
417 gest that the robustness of protein stability to UPS perturbation arises because most ubiquitylation



418 and deubiquitylation in unperturbed extracts occurs on non-degradative substrates. Addition of ubiquitin  
419 alone led to ubiquitin incorporation into hundreds of proteins in a manner that did not impact  
420 their stability. Furthermore, addition of UbVS alone led to alterations in protein ubiquitylation but  
421 caused no change in protein stability, instead causing a rapid depletion of free ubiquitin. This finding  
422 highlights the predominant role of UbVS-sensitive DUBs in recycling ubiquitin in extracts.  
423 Included among the non-degradative targets of UbVS-sensitive DUBs, we identified highly abundant  
424 proteins such as histones and ribosomes that may serve to sequester ubiquitin to “store” it for  
425 other purposes, such as stress resistance. Consistent with this idea, proteotoxic stresses such as  
426 heat shock or proteasome inhibition that induce a high demand for free ubiquitin, cause a redistribution  
427 of ubiquitin from histones to misfolded proteins or to proteins targeted to degradation in  
428 actively growing cells (Dantuma et al. 2006) (Rose et al. 2016)

429 Although most ubiquitylation in *Xenopus* extract appears to be non-degradative, our experiments  
430 also identified a set of novel degradative substrates whose stability requires ongoing  
431 deubiquitylation by UbVS-sensitive DUBs. DUB-dependent stability of these proteins was revealed  
432 only when DUBs were broadly inhibited, and available ubiquitin was restored. We confirmed  
433 DUB-dependent stability of these substrates with recombinant human proteins, demonstrating  
434 evolutionary conservation. Several substrates are known to be regulated by specific DUBs,  
435 including MARCH7, BIRC3, STAM and NFX1 (Nathan et al. 2008) (Mei et al. 2011) (Chen et al.  
436 2019) (Cai et al. 2015). Furthermore, PIM3 and WASL have not been connected previously to  
437 DUBs, but are similar in sequence to well-known DUB substrates (PIM2 (Kategaya et al. 2017)  
438 and WASH (Hao et al. 2015) respectively). Together, these findings validate that our approach can  
439 identify established DUB substrates. Still, the vast majority of the proteins we identified are not  
440 known DUB substrates, demonstrating the novelty of our findings. Our candidate substrates were

441 enriched for ubiquitin ligases (n=12), extending our understanding of the importance of DUBs in  
442 counteracting their auto-ubiquitylation and consequent degradation(W. Kim et al. 2011)(Ventii  
443 and Wilkinson 2008). Makorin Ring Finger protein 1 (MKRN1) ubiquitylates p53 and p21 target-  
444 ing them to proteasomal degradation(E.-W. Lee et al. 2009). Yet despite intensive study, a role for  
445 DUBs in controlling MKRN1 stability has not been described. Our data suggest that DUB-depend-  
446 ent stability of MKRN1 could be an important control mechanism, as it is for MDM2, another p53  
447 ubiquitin ligase(Ranaweera and Yang 2013).

448         Beyond ubiquitin ligases, we identified substrates with a broad range of functions. We  
449 found multiple transcription factors (n=7) and proteins involved in RNA metabolism (n=12). A  
450 number of substrates, such as SPRTN, ETAA1, and the Casein Kinases  $\epsilon$  and  $\delta$ , have been exten-  
451 sively studied, so it is surprising that DUB-dependent control of their stability has not yet been  
452 reported. SPRTN and ETAA1 are both involved in DNA replication/damage and are essential for  
453 maintaining genome stability(Vaz et al. 2016)(Haahr et al. 2016). Casein Kinases  $\epsilon$  and  $\delta$  are  
454 versatile proteins that participate in multiple processes such as cell cycle control, spindle organi-  
455 zation, and circadian rhythm(Schitteck and Sinnberg 2014). Our study suggests that DUBs could  
456 modulate their degradation by the UPS as mechanism to regulate their activity.

457         This study also describes a new approach for studying the specificity and activity of DUBs  
458 in a system in which physiological rates of substrate ubiquitylation are maintained. Our approach  
459 measures effects on degradation rather than deubiquitylation, providing a new way of assessing  
460 the ability of DUBs to counter proteasome-mediated degradation. The most unexpected finding  
461 to emerge from this analysis was the ability of USP7 to rescue a large number of substrates from  
462 degradation. Despite this broad activity, USP7 was unable to rescue APC/C substrates from

463 degradation, suggesting that USP7 is not a general inhibitor of proteasome activity. This result was  
464 not due to a lack of activity of USP7 in mitosis because we verified that USP7 was still fully active  
465 in mitosis (data not shown). Furthermore, even though USP7 was able to broadly rescue substrates  
466 from degradation, USP7 was unable to rescue ubiquitin depletion in UbVS-treated extract. To-  
467 gether these findings indicate that USP7 has a defined substrate specificity that seems targeted  
468 towards degradative versus non-degradative substrates. Interestingly, we also observed exactly the  
469 opposite pattern of specificity with USP21(Yu Ye et al. 2011), which was able to rescue ubiquitin  
470 availability but was unable to rescue degradation of our panel of substrates.

471         What explains the broad ability of USP7 to antagonize proteasomal degradation? USP7 has  
472 been highly studied and has attracted attention as a pharmacological target, as it regulates the sta-  
473 bility of the tumor suppressor p53 and its regulator MDM2(Sheng et al. 2006). Among the DUBs  
474 we tested, USP7 has the greatest number of published substrates, most of which are targeted to the  
475 proteasome(R. Q. Kim and Sixma 2017). Among the substrates that we identified, a few such as  
476 MARCH7, SVIL, NEK2A, and TRIP12 are known targets of USP7(Nathan et al. 2008)(Fang and  
477 Luna 2013)(Franqui-Machin et al. 2018)(Cai et al. 2015) whereas two others, PIM3 and WASL,  
478 are likely USP7 targets since it deubiquitylates related proteins (PIM2(Kategaya et al. 2017) and  
479 WASH(Hao et al. 2015) respectively) in human cells. USP7 has been reported to associate with  
480 the proteasome(Bousquet-Dubouch et al. 2009)(Besche et al. 2009), where it could intercept pro-  
481 teins that are targeted for degradation. However, the physiological significance and mechanism of  
482 this association has not been carefully studied. USP7 may have a broad ability to rescue substrates  
483 from degradation because it directly binds a wide range of proteins through recognition of common  
484 degenerate motifs (P/AxxS and Kxxx/KxK) that are found in many proteins(R. Q. Kim and Sixma  
485 2017). Another plausible explanation is that USP7 is kinetically sufficient to counteract the rates

486 of ubiquitylation of ubiquitin ligases that target substrates for degradation. This idea is supported  
487 by USP7 being the most active DUB in Ub-AMC assays among a panel of 12 cysteine DUBs  
488 tested(Faesen et al. 2011).

489 Our study also highlights the important impact and challenge of functional redundancy  
490 when studying DUB activity and specificity. In the *Xenopus* system, we observed that inhibition  
491 of USP7 alone was not sufficient to induce degradation of substrates, despite USP7's ability to  
492 broadly rescue substrates from degradation. This finding supports the notion that DUBs function  
493 redundantly to maintain the stability of the proteins in this system. Because degradation is an irre-  
494 versible step in the protein lifecycle, DUB redundancy may help set a higher threshold for ubiq-  
495 uitylation required for degradation of a protein, beyond what is required for direct recognition by  
496 the proteasome. On the other hand, DUB redundancy poses a serious technical challenge to fully  
497 understand the role of DUBs and identify their substrates, especially using genetic approaches.  
498 Our work highlights how unmasking DUB redundancy it is key not only for discovery of novel  
499 DUB substrates but also to fully understand functional specificity of these important enzymes.

## 500 **Materials and Methods**

### 501 **Gene nomenclature**

502 The human gene symbols have been used for consistency and simplicity in the manuscript.

503

### 504 **Reagents**

505 Commercial antibodies used for Western blotting analysis were as follow: anti-Ube2C (A-  
506 650, Boston Biochem), anti-ubiquitin (P4D1; sc-8017; Santa Cruz Biotechnology), anti-HA-pe-  
507 roxidase (3F10; Roche), anti-USP7 (A300-033A; Bethyl). Secondary antibodies used included  
508 anti-rabbit IgG-HRP (NA934V) and anti-mouse IgG-HRP (NA931V) from GE Healthcare. Chem-  
509 icals used in this study included Ubiquitin vinyl sulfone (U-202), MG262 (I-120), Ubiquitin vinyl  
510 sulfone tagged with HA (U-212) and HA-ubiquitin (U-110) purchased from Boston Biochem. For  
511 immunoprecipitation anti-HA-Agarose beads (A2095) from Sigma were used. For the diGly ex-  
512 periment immunoaffinity beads from Cell Signaling were used (5562). Ubiquitin (U-100H) and  
513 recombinant DUBs were provided by Boston Biochem (E-519, USP7; E-520, USP8; E-320, USP5;  
514 E-325, UCHL3; E-325, UCHL5; E-546, USP25; E-552, USP9x; E-570, USP28; E-574, OTUD3;  
515 E-592, USP10; E-594, USP15; E-596, USP4).

516

### 517 **Preparation of *Xenopus laevis* egg extract**

518 Interphase extract was prepared as previously described(Murray AW 1991) but using 2  
519  $\mu\text{g/ml}$  calcium ionophore (A23187, Calbiochem) for egg activation. Entry into mitosis was in-  
520 duced by addition of 1  $\mu\text{M}$  non-degradable cyclin B (MBP- $\Delta 90$ ) as previously described(Zeng et  
521 al. 2010).

522

523 **HA-UbVS immunoprecipitation**

524           Following treatment with 10  $\mu$ M HA-UbVS (10 minutes at 24°C), *Xenopus* extract was  
525 diluted three times with XB buffer (10 mM potassium HEPES pH 7.7, 500 mM KCl, 0.1 mM  
526 CaCl<sub>2</sub>, 1 mM MgCl<sub>2</sub>, 0.5% NP40) and incubated with anti-HA beads or empty beads at 4°C (1h  
527 and 30 minutes). At the end of the incubation, beads were washed three times with XB buffer, SDS  
528 sample buffer was added and samples were subjected to SDS gel electrophoresis. Samples were  
529 processed according to the GeLC-MS/MS strategy(Paulo 2016).

530

531 **HA-UbVS immunodepletion**

532           *Xenopus* extract was pre-treated with 10  $\mu$ M HA-UbVS (10 minutes at 24°C) diluted three  
533 times with XB buffer and incubated with anti-HA beads or empty beads overnight at 4°C. Super-  
534 natants from the beads were collected and treated for Mass Spectrometry analysis by SL-TMT  
535 method (described below).

536

537 **HA-ubiquitin immunoprecipitation**

538           Following treatment with 50  $\mu$ M HA-ubiquitin (30 minutes at 24°C), *Xenopus* extract was  
539 diluted three times with XB buffer (10 mM potassium HEPES pH 7.7, 500 mM KCl, 0.1 mM  
540 CaCl<sub>2</sub>, 1 mM MgCl<sub>2</sub>, 0.5% NP40, Pierce proteases inhibitor tablet and NEM 5mM) and incubated  
541 with anti-HA beads or empty beads at 4°C (2h). At the end of the incubation, beads were washed  
542 four times with XB buffer and elute with the HA peptide (two times). Samples were processed for  
543 Mass Spectrometry analysis by SL-TMT method (described below).

544

545 **Immunoprecipitation of diGly-containing peptides**

546

547 Dried peptides (2 mg of proteins) were resuspended in IAP buffer [50 mM MOPS (pH  
548 7.2), 10 mM sodium phosphate and 50 mM NaCl] and centrifuged at top speed (5 min). After that  
549 the supernatants were added to the diGly resin (Cell Signaling Technology) and incubated for 2 hr  
550 at 4°C. After that, beads were washed three times with ice-cold IAP buffer and twice with PBS.  
551 The diGly peptides were eluted twice with 0.15% TFA, desalted using homemade StageTips and  
552 dried via vacuum centrifugation. Peptides were immunoprecipitated twice. Samples were pro-  
553 cessed for Mass Spectrometry analysis by SL-TMT method (described below).

554

#### 555 **Degradation of <sup>35</sup>S-methionine labeled substrates**

556 Extract was pre-treated with UbVS (10 μM) for 10 min at 24°C before addition of ubiquitin  
557 (50 μM) and substrates. The preincubation time with UbVS was extended to 30 minutes when  
558 recombinant DUBs were added to the extract. Pre-treatment of extract with MG262 (200 μM) or  
559 specific DUB inhibitors was done at 24°C for 30 minutes. Substrates were expressed and labeled  
560 using <sup>35</sup>S-methionine (Perkin Elmer, NEG709A500UC) with the TNT kit (Promega: L1770). Each  
561 substrate was amplified with primers by PCR to allow T7-dependent transcription of the PCR  
562 product or transcribed directly if plasmids contained a T7 promoter. The translation reaction mix  
563 was added to the *Xenopus* extract at 8% final volume. Samples of the reactions were collected at  
564 the indicated time, quenched with sodium dodecyl sulfate (SDS) sample buffer, and processed for  
565 SDS gel electrophoresis and phosphor imaging (Bio-Rad PMI). Quantification was performed us-  
566 ing Quantity One software (Bio-Rad).

567

#### 568 **UbVS labeling of recombinant DUBs to verify their activity**

569 Each DUB (1 $\mu$ M) was incubated with saturating amount of UbVS or HA-UbVS as indi-  
570 cated (1 hour at 30°C). Reactions were stopped with addition of sodium dodecyl sulfate (SDS)  
571 sample buffer and run on SDS-PAGE. After SDS-PAGE, the gel was stained with Coomassie  
572 Brilliant Blue.

573

## 574 **Streamlined Tandem Mass Tag Protocol**

### 575 Peptide extraction and digestion

576 The TMT labeling protocol and mass spectrometry analysis were based on the SL-TMT  
577 sample preparation strategy (Navarrete-Perea et al. 2018). *Xenopus* extract was collected, resus-  
578 pended in the appropriate buffer (1% SDS, 5 mM DTT, 50 mM Tris pH 8.8 and Pierce protease  
579 inhibitor tablet) and flash frozen in liquid nitrogen. Methanol–chloroform precipitation was per-  
580 formed. Four volumes of methanol were added to each sample and briefly vortexed. One volume  
581 chloroform was added to the samples and vortexed again. Lastly, three volumes water was added  
582 and vortexed. The samples were centrifuged (5 minutes, 14000 RPM) and subsequently washed  
583 twice with cold methanol. Samples were resuspended in 200 mM EPPS, pH 8.5 and digested over-  
584 night at 24°C with Lys-C protease (Wako Chemicals). Later samples were incubated for 6 hours  
585 at 37°C for digestion by trypsin protease (Pierce Biotechnology).

586

### 587 Isobaric labeling and fractionation

588 Tandem mass tag (TMT) isobaric reagents (Thermo Fisher Scientific) were resuspended in  
589 anhydrous acetonitrile (final concentration of 20  $\mu$ g/ $\mu$ L). 10  $\mu$ L of the labeling reagents plus 30  
590  $\mu$ L of acetonitrile was added to the peptides obtained by the previous digestions (~100  $\mu$ g). After  
591 incubation at room temperature (90 minutes), the reaction was quenched using hydroxylamine to



592 a final concentration of 0.3% (v/v). The TMT-labeled samples were pooled at a 1:1 ratio across  
593 all the samples. Fractions were fractionated off-line using basic pH reversed phase chromatog-  
594 raphy (BPRP). Fractions were pooled into 6 or 12 super-fractions which were acidified with formic  
595 acid to a final concentration of 1%. The pooled peptides were desalted using homemade StageTip,  
596 dried with vacuum centrifugation, and reconstituted in 5% acetonitrile and 5% formic acid for LC-  
597 MS/MS processing.

598

### 599 Peptide detection, identification and quantification

600 All samples were analyzed on an Orbitrap Fusion mass spectrometer (Thermo Fisher Sci-  
601 entific) coupled to a Proxeon EASY-nLC 1000 liquid chromatography (LC) pump (Thermo Fisher  
602 Scientific). Peptides were separated on a column packed with 35 cm of Accucore C18 resin (2.6  
603  $\mu\text{m}$ , 150 Å, Thermo Fisher Scientific). The column had a 100  $\mu\text{m}$  inner diameter microcapillary.  
604 For each experiment, 2  $\mu\text{g}$  of peptides were loaded onto this column. Peptides were separated,  
605 using a flow rate of 450 nL/min., with a 150-minute gradient of 3 to 25% acetonitrile in 0.125%  
606 formic acid. Each analysis used an MS3-based TMT method, which it is known to reduce ion  
607 interference if compared to MS2 quantification. The scan sequence starts with an MS1 spectrum  
608 (Orbitrap analysis, resolution 120,000, 400–1400 Th, automatic gain control (AGC) target 5E5,  
609 maximum injection time 100 ms). For subsequent MS2/MS3 analysis, only the top 10 precursors  
610 were selected. MS2 analysis included: collision-induced dissociation (CID), quadrupole ion trap  
611 analysis, automatic gain control (AGC) 2E4, NCE (normalized collision energy) 35, q-value 0.25,  
612 maximum injection time 120 ms), and isolation window at 0.7. After we acquire each MS2 spec-  
613 trum, we collected an MS3 spectrum in which multiple MS2 fragment ions were captured in the  
614 MS3 precursor population with isolation waveforms using multiple frequency notches. MS3

615 precursors were fragmented by HCD and analyzed using the Orbitrap (NCE 65, AGC 1.5E5, max-  
616 imum injection time 150 ms, resolution was 50,000 at 400 Th). For MS3 analysis, we used charge  
617 state-dependent isolation windows: For charge state  $z=2$ , the isolation window was set at 1.3 Th,  
618 for  $z=3$  at 1 Th, for  $z=4$  at 0.8 Th, and for  $z=5$  at 0.7 Th. Collected Spectra were processed using  
619 a Sequest-based software pipeline. Spectra were converted to mzXML using MS Convert  
620 (Adusumilli and Mallick 2017). Database searching included all the entries from the PHROG da-  
621 tabas. This database includes many lower abundant proteins and multiple splice isoforms (not pre-  
622 sent in other databases). In the original study, around 11,000 proteins were identified (Wühr et al.  
623 2014). Thus, our study (with ~8000 proteins) represents an acceptable coverage of the *Xenopus*  
624 proteome. This database was concatenated with one composed of the sequences in the reversed  
625 order. Searches were performed using a 50 Th precursor ion tolerance and the product ion tolerance  
626 was set to 0.9 Da. Oxidation of methionine residues (+15.995 Da) and, where indicated. Peptide-  
627 spectrum matches (PSMs) were adjusted to a 1% false discovery rate (FDR). PSM filtering was  
628 performed using a linear discriminant analysis, as described previously and assembled to a final  
629 protein-level FDR of 1%. Proteins were quantified by summing reporter ion counts across all  
630 matching PSMs (McAlister et al. 2012). Reporter ion intensities were adjusted to correct for the  
631 isotopic impurities of the different TMT reagents according to manufacturer specifications. The  
632 peptides signal-to-noise (S/N) measurements assigned to each protein were summed and normal-  
633 ized so that the sum of the signal for all proteins in each channel was equivalent, thereby account-  
634 ing for equal protein loading. Lastly, each protein was scaled such that the summed signal-to-noise  
635 for that protein across all channels was 100, thereby generating a relative abundance (RA) meas-  
636 urement.  
637

638 **TMT Mass-spectrometry analysis**

639           A two-sided Student's t-test was used as a measure of statistical confidence of the observed  
640  $\log_2$  fold change. Selected candidates met both thresholds (Fold Change  $\leq -1.5$  and  $p$ -value $<0.05$ )  
641 in the experiments. For Figure 1g, the candidates were included if at least one peptide was identi-  
642 fied in both of the experiments. For subsequent figures, where a single experiment was performed,  
643 candidates were included only if they were detected with at least 2 different peptides. When mul-  
644 tiple isoforms of the same protein decreased in UbVS/ubiquitin, only the isoform with more pep-  
645 tides was selected (for simplicity isoforms are not indicated in the figures).

646 **References**

- 647 Adusumilli, Ravali, and Parag Mallick. 2017. “Data Conversion with ProteoWizard MsConvert.”  
648 In *Methods in Molecular Biology*, 1550:339–68. [https://doi.org/10.1007/978-1-4939-6747-](https://doi.org/10.1007/978-1-4939-6747-6_23)  
649 [6\\_23](https://doi.org/10.1007/978-1-4939-6747-6_23).
- 650 Aufderheide, Antje, Pia Unverdorben, Wolfgang Baumeister, and Friedrich Förster. 2015.  
651 “Structural Disorder and Its Role in Proteasomal Degradation.” *FEBS Letters* 589 (19):  
652 2552–60. <https://doi.org/10.1016/J.FEBSLET.2015.07.034>.
- 653 Beckley, Janel R., Jun-Song Chen, Yanling Yang, Junmin Peng, and Kathleen L. Gould. 2015.  
654 “A Degenerate Cohort of Yeast Membrane Trafficking DUBs Mediates Cell Polarity and  
655 Survival.” *Molecular & Cellular Proteomics* 14 (12): 3132–41.  
656 <https://doi.org/10.1074/mcp.M115.050039>.
- 657 Berlin, Ilana, Heather Schwartz, and Piers D. Nash. 2010. “Regulation of Epidermal Growth  
658 Factor Receptor Ubiquitination and Trafficking by the USP8·STAM Complex.” *Journal of*  
659 *Biological Chemistry* 285 (45): 34909–21. <https://doi.org/10.1074/jbc.M109.016287>.
- 660 Besche, Henrike C., Wilhelm Haas, Steven P. Gygi, and Alfred L. Goldberg. 2009. “Isolation of  
661 Mammalian 26S Proteasomes and P97/VCP Complexes Using the Ubiquitin-like Domain  
662 from HHR23B Reveals Novel Proteasome-Associated Proteins †.” *Biochemistry* 48 (11):  
663 2538–49. <https://doi.org/10.1021/bi802198q>.
- 664 Borodovsky, A, B M Kessler, R Casagrande, H S Overkleeft, K D Wilkinson, and H L Ploegh.  
665 2001. “A Novel Active Site-Directed Probe Specific for Deubiquitylating Enzymes Reveals  
666 Proteasome Association of USP14.” *The EMBO Journal* 20 (18): 5187–96.  
667 <https://doi.org/10.1093/emboj/20.18.5187>.
- 668 Boselli, Monica, Byung-Hoon Lee, Jessica Robert, Miguel A Prado, Sang-Won Min, Chialin

- 669 Cheng, M Catarina Silva, et al. 2017. “An Inhibitor of the Proteasomal Deubiquitinating  
670 Enzyme USP14 Induces Tau Elimination in Cultured Neurons.” *The Journal of Biological  
671 Chemistry* 292 (47): 19209–25. <https://doi.org/10.1074/jbc.M117.815126>.
- 672 Bousquet-Dubouch, Marie-Pierre, Emilie Baudalet, Frédéric Guérin, Mariette Matondo,  
673 Sandrine Uttenweiler-Joseph, Odile Burlet-Schiltz, and Bernard Monsarrat. 2009. “Affinity  
674 Purification Strategy to Capture Human Endogenous Proteasome Complexes Diversity and  
675 to Identify Proteasome-Interacting Proteins.” *Molecular & Cellular Proteomics : MCP* 8  
676 (5): 1150–64. <https://doi.org/10.1074/mcp.M800193-MCP200>.
- 677 Bremm, Anja, Stefan M V Freund, and David Komander. 2010. “Lys11-Linked Ubiquitin  
678 Chains Adopt Compact Conformations and Are Preferentially Hydrolyzed by the  
679 Deubiquitinase Cezanne.” *Nature Structural & Molecular Biology* 17 (8): 939–47.  
680 <https://doi.org/10.1038/nsmb.1873>.
- 681 Cai, Jia-Bin, Guo-Ming Shi, Zhao-Ru Dong, Ai-Wu Ke, Hong-Hui Ma, Qiang Gao, Zao-Zhuo  
682 Shen, et al. 2015. “Ubiquitin-Specific Protease 7 Accelerates P14<sup>ARF</sup> Degradation by  
683 Deubiquitinating Thyroid Hormone Receptor-Interacting Protein 12 and Promotes  
684 Hepatocellular Carcinoma Progression.” *Hepatology* 61 (5): 1603–14.  
685 <https://doi.org/10.1002/hep.27682>.
- 686 Chau, V, J W Tobias, A Bachmair, D Marriott, D J Ecker, D K Gonda, and A Varshavsky. 1989.  
687 “A Multiubiquitin Chain Is Confined to Specific Lysine in a Targeted Short-Lived Protein.”  
688 *Science (New York, N.Y.)* 243 (4898): 1576–83. <https://doi.org/10.1126/science.2538923>.
- 689 Chen, Xiangling, Dayun Lu, Jing Gao, Hongwen Zhu, Yanting Zhou, Daming Gao, and Hu  
690 Zhou. 2019. “Identification of a USP9X Substrate NFX1-123 by SILAC-Based Quantitative  
691 Proteomics.” *Journal of Proteome Research* 18 (6): 2654–65.

692 <https://doi.org/10.1021/acs.jproteome.9b00139>.

693 Clague, Michael J., Igor Barsukov, Judy M. Coulson, Han Liu, Daniel J. Rigden, and Sylvie  
694 Urbé. 2013. “Deubiquitylases from Genes to Organism.” *Physiological Reviews* 93 (3):  
695 1289–1315. <https://doi.org/10.1152/physrev.00002.2013>.

696 Clague, Michael J., Judy M. Coulson, and Sylvie Urbé. 2012. “Cellular Functions of the DUBs.”  
697 *J Cell Sci* 125 (2): 277–86. <https://doi.org/10.1242/JCS.090985>.

698 Clague, Michael J., Claire Heride, and Sylvie Urbé. 2015. “The Demographics of the Ubiquitin  
699 System.” *Trends in Cell Biology* 25 (7): 417–26. <https://doi.org/10.1016/j.tcb.2015.03.002>.

700 Crespo-Yañez, Xènia, Carmen Aguilar-Gurrieri, Anne Claire Jacomin, Agnès Journet, Magda  
701 Mortier, Emmanuel Taillebourg, Emmanuelle Soleilhac, Winfried Weissenhorn, and Marie  
702 Odile Fauvarque. 2018. “CHMP1B Is a Target of USP8/UBPY Regulated by Ubiquitin  
703 during Endocytosis.” *PLoS Genetics* 14 (6). <https://doi.org/10.1371/journal.pgen.1007456>.

704 Dantuma, Nico P., Tom A.M. Groothuis, Florian A. Salomons, and Jacques Neefjes. 2006. “A  
705 Dynamic Ubiquitin Equilibrium Couples Proteasomal Activity to Chromatin Remodeling.”  
706 *Journal of Cell Biology* 173 (1): 19–26. <https://doi.org/10.1083/jcb.200510071>.

707 Dimova, Nevena V., Nathaniel A. Hathaway, Byung-Hoon Lee, Donald S. Kirkpatrick, Marie  
708 Lea Berkowitz, Steven P. Gygi, Daniel Finley, and Randall W. King. 2012. “APC/C-  
709 Mediated Multiple Monoubiquitylation Provides an Alternative Degradation Signal for  
710 Cyclin B1.” *Nature Cell Biology* 14 (2): 168–76. <https://doi.org/10.1038/ncb2425>.

711 Faesen, Alex C, Mark P A Luna-Vargas, Paul P Geurink, Marcello Clerici, Remco Merkx,  
712 Willem J van Dijk, Dharjath S Hameed, Farid El Oualid, Huib Ovaa, and Titia K Sixma.  
713 2011. “The Differential Modulation of USP Activity by Internal Regulatory Domains,  
714 Interactors and Eight Ubiquitin Chain Types.” *Chemistry & Biology* 18 (12): 1550–61.

- 715 <https://doi.org/10.1016/j.chembiol.2011.10.017>.
- 716 Fang, Zhiyou, and Elizabeth J Luna. 2013. “Supervillin-Mediated Suppression of P53 Protein  
717 Enhances Cell Survival.” *The Journal of Biological Chemistry* 288 (11): 7918–29.  
718 <https://doi.org/10.1074/jbc.M112.416842>.
- 719 Field, Christine M., and Timothy J. Mitchison. 2018. “Assembly of Spindles and Asters in  
720 *Xenopus* Egg Extracts.” *Cold Spring Harbor Protocols* 2018 (6): 440–48.  
721 <https://doi.org/10.1101/pdb.prot099796>.
- 722 Flierman, Dennis, Gerbrand J van der Heden van Noort, Reggy Ekkebus, Paul P Geurink, Tycho  
723 E T Mevissen, Manuela K Hospenthal, David Komander, and Huib Ovaas. 2016. “Non-  
724 Hydrolyzable Diubiquitin Probes Reveal Linkage-Specific Reactivity of Deubiquitylating  
725 Enzymes Mediated by S2 Pockets.” *Cell Chemical Biology* 23 (4): 472–82.  
726 <https://doi.org/10.1016/j.chembiol.2016.03.009>.
- 727 Franqui-Machin, Reinaldo, Mu Hao, Hua Bai, Zhimin Gu, Xin Zhan, Hasem Habelhah, Yogesh  
728 Jethava, et al. 2018. “Destabilizing NEK2 Overcomes Resistance to Proteasome Inhibition  
729 in Multiple Myeloma.” *The Journal of Clinical Investigation* 128 (7): 2877–93.  
730 <https://doi.org/10.1172/JCI98765>.
- 731 Glotzer, M, A W Murray, and M W Kirschner. 1991. “Cyclin Is Degraded by the Ubiquitin  
732 Pathway.” *Nature* 349 (6305): 132–38. <https://doi.org/10.1038/349132a0>.
- 733 Haahr, Peter, Saskia Hoffmann, Maxim A. X. Tollenaere, Teresa Ho, Luis Ignacio Toledo,  
734 Matthias Mann, Simon Bekker-Jensen, Markus Räschle, and Niels Mailand. 2016.  
735 “Activation of the ATR Kinase by the RPA-Binding Protein ETAA1.” *Nature Cell Biology*  
736 18 (11): 1196–1207. <https://doi.org/10.1038/ncb3422>.
- 737 Hadari, T, J V Warms, I A Rose, and A Hershko. 1992. “A Ubiquitin C-Terminal Isopeptidase

738 That Acts on Polyubiquitin Chains. Role in Protein Degradation.” *The Journal of Biological*  
739 *Chemistry* 267 (2): 719–27. <http://www.ncbi.nlm.nih.gov/pubmed/1309773>.

740 Hao, Yi-Heng, Michael D. Fountain, Klementina Fon Tacer, Fan Xia, Weimin Bi, Sung-Hae L.  
741 Kang, Ankita Patel, et al. 2015. “USP7 Acts as a Molecular Rheostat to Promote WASH-  
742 Dependent Endosomal Protein Recycling and Is Mutated in a Human Neurodevelopmental  
743 Disorder.” *Molecular Cell* 59 (6): 956–69. <https://doi.org/10.1016/j.molcel.2015.07.033>.

744 Hershko, A, and Ciechanover A. 1998. “The Ubiquitin System.” *Annu. Rev. Biochem.* 67: 425–  
745 79.

746 Huang, Tony T., Sebastian M.B. Nijman, Kanchan D. Mirchandani, Paul J. Galardy, Martin A.  
747 Cohn, Wilhelm Haas, Steven P. Gygi, Hidde L. Ploegh, René Bernards, and Alan D.  
748 D’Andrea. 2006. “Regulation of Monoubiquitinated PCNA by DUB Autocleavage.” *Nature*  
749 *Cell Biology* 8 (4): 339–47. <https://doi.org/10.1038/ncb1378>.

750 Iyengar, Prasanna Vasudevan, Patrick Jaynes, Laura Rodon, Dilraj Lama, Kai Pong Law, Yoon  
751 Pin Lim, Chandra Verma, Joan Seoane, and Pieter Johan Adam Eichhorn. 2015. “USP15  
752 Regulates SMURF2 Kinetics through C-Lobe Mediated Deubiquitination.” *Scientific*  
753 *Reports* 5 (October). <https://doi.org/10.1038/srep14733>.

754 Jackson, Stephen P., and Daniel Durocher. 2013. “Regulation of DNA Damage Responses by  
755 Ubiquitin and SUMO.” *Molecular Cell* 49 (5): 795–807.  
756 <https://doi.org/10.1016/j.molcel.2013.01.017>.

757 Jehl, Peter, Jean Manguy, Denis C. Shields, Desmond G. Higgins, and Norman E. Davey. 2016.  
758 “ProViz—a Web-Based Visualization Tool to Investigate the Functional and Evolutionary  
759 Features of Protein Sequences.” *Nucleic Acids Research* 44 (W1): W11–15.  
760 <https://doi.org/10.1093/nar/gkw265>.



- 761 Kategaya, Lorna, Paola Di Lello, Lionel Rougé, Richard Pastor, Kevin R Clark, Jason  
762 Drummond, Tracy Kleinheinz, et al. 2017. “USP7 Small-Molecule Inhibitors Interfere with  
763 Ubiquitin Binding.” *Nature* 550 (7677): 534–38. <https://doi.org/10.1038/nature24006>.
- 764 Kim, Robbert Q., and Titia K. Sixma. 2017. “Regulation of USP7: A High Incidence of E3  
765 Complexes.” *Journal of Molecular Biology* 429 (22): 3395–3408.  
766 <https://doi.org/10.1016/j.jmb.2017.05.028>.
- 767 Kim, Woong, Eric J Bennett, Edward L Huttlin, Ailan Guo, Jing Li, Anthony Possemato,  
768 Mathew E Sowa, et al. 2011. “Systematic and Quantitative Assessment of the Ubiquitin-  
769 Modified Proteome.” *Molecular Cell* 44 (2): 325–40.  
770 <https://doi.org/10.1016/j.molcel.2011.08.025>.
- 771 Komander, David, and Michael Rape. 2012. “The Ubiquitin Code.” *Annual Review of*  
772 *Biochemistry* 81 (1): 203–29. <https://doi.org/10.1146/annurev-biochem-060310-170328>.
- 773 Kwon, Seul-Ki, Madhuri Saindane, and Kwang-Hyun Baek. 2017. “P53 Stability Is Regulated  
774 by Diverse Deubiquitinating Enzymes.” *Biochimica et Biophysica Acta (BBA) - Reviews on*  
775 *Cancer* 1868 (2): 404–11. <https://doi.org/10.1016/j.bbcan.2017.08.001>.
- 776 Lamberto, Ilaria, Xiaoxi Liu, Hyuk-Soo Seo, Nathan J. Schauer, Roxana E. Jacob, Wanyi Hu,  
777 Deepika Das, et al. 2017. “Structure-Guided Development of a Potent and Selective Non-  
778 Covalent Active-Site Inhibitor of USP7.” *Cell Chemical Biology* 24 (12): 1490-1500.e11.  
779 <https://doi.org/10.1016/j.chembiol.2017.09.003>.
- 780 Lauwers, Elsa, Christophe Jacob, and Bruno André. 2009. “K63-Linked Ubiquitin Chains as a  
781 Specific Signal for Protein Sorting into the Multivesicular Body Pathway.” *The Journal of*  
782 *Cell Biology* 185 (3): 493–502. <https://doi.org/10.1083/jcb.200810114>.
- 783 Lee, Byung-Hoon, Min Jae Lee, Soyeon Park, Dong-Chan Oh, Suzanne Elsasser, Ping-Chung

- 784           Chen, Carlos Gartner, et al. 2010 “Enhancement of Proteasome Activity by a Small-  
785           Molecule Inhibitor of USP14.” *Nature* 467 (7312): 179-84  
786           <https://doi.org/10.1038/nature09299>.
- 787   Lee, Eun-Woo, Min-Sik Lee, Suzanne Camus, Jaewang Ghim, Mi-Ran Yang, Wonkyung Oh,  
788           Nam-Chul Ha, David P Lane, and Jaewhan Song. 2009. “Differential Regulation of P53 and  
789           P21 by MKRN1 E3 Ligase Controls Cell Cycle Arrest and Apoptosis.” *The EMBO Journal*  
790           28 (14): 2100–2113. <https://doi.org/10.1038/emboj.2009.164>.
- 791   Ma, Jianhong, John D. Martin, Yu Xue, Leng A. Lor, Karen M. Kennedy-Wilson, Robert H.  
792           Sinnamon, Thau F. Ho, et al. 2010. “C-Terminal Region of USP7/HAUSP Is Critical for  
793           Deubiquitination Activity and Contains a Second Mdm2/P53 Binding Site.” *Archives of*  
794           *Biochemistry and Biophysics* 503 (2): 207–12. <https://doi.org/10.1016/j.abb.2010.08.020>.
- 795   McAlister, Graeme C, Edward L Huttlin, Wilhelm Haas, Lily Ting, Mark P Jedrychowski, John  
796           C Rogers, Karsten Kuhn, et al. 2012. “Increasing the Multiplexing Capacity of TMTs Using  
797           Reporter Ion Isotopologues with Isobaric Masses.” *Analytical Chemistry* 84 (17): 7469–78.  
798           <https://doi.org/10.1021/ac301572t>.
- 799   Mei, Yide, Allison Alcivar Hahn, Shimin Hu, and Xiaolu Yang. 2011. “The USP19  
800           Deubiquitinase Regulates the Stability of C-IAP1 and c-IAP2.” *The Journal of Biological*  
801           *Chemistry* 286 (41): 35380–87. <https://doi.org/10.1074/jbc.M111.282020>.
- 802   Mevissen, Tycho E T, and David Komander. 2017. “Mechanisms of Deubiquitinase Specificity  
803           and Regulation” 86: 159–92. <https://doi.org/10.1146/annurev-biochem>.
- 804   Murray AW. 1991. “Cell Cycle Extracts.” *Methods Cell Biol* 36: 581–605.  
805           <https://www.ncbi.nlm.nih.gov/pubmed/?term=Murray+Cell+cycle+extracts+1991>.
- 806   Nathan, James A., Soma Sengupta, Stephen A. Wood, Arie Admon, Gabriel Markson, Chris

- 807 Sanderson, and Paul J. Lehner. 2008. “The Ubiquitin E3 Ligase MARCH7 Is Differentially  
808 Regulated by the Deubiquitylating Enzymes USP7 and USP9X.” *Traffic* 9 (7): 1130–45.  
809 <https://doi.org/10.1111/j.1600-0854.2008.00747.x>.
- 810 Navarrete-Perea, José, Qing Yu, Steven P. Gygi, and Joao A. Paulo. 2018. “Streamlined Tandem  
811 Mass Tag (SL-TMT) Protocol: An Efficient Strategy for Quantitative (Phospho)Proteome  
812 Profiling Using Tandem Mass Tag-Synchronous Precursor Selection-MS3.” *Journal of*  
813 *Proteome Research* 17 (6): 2226–36. <https://doi.org/10.1021/acs.jproteome.8b00217>.
- 814 Paulo, Joao A. 2016. “Sample Preparation for Proteomic Analysis Using a GeLC-MS/MS  
815 Strategy.” *Journal of Biological Methods* 3 (3): 45. <https://doi.org/10.14440/jbm.2016.106>.
- 816 Poot, Stefanie A.H. de, Geng Tian, and Daniel Finley. 2017. “Meddling with Fate: The  
817 Proteasomal Deubiquitinating Enzymes.” *Journal of Molecular Biology* 429 (22): 3525–45.  
818 <https://doi.org/10.1016/j.jmb.2017.09.015>.
- 819 Ranaweera, Ruchira S, and Xiaolu Yang. 2013. “Auto-Ubiquitination of Mdm2 Enhances Its  
820 Substrate Ubiquitin Ligase Activity.” *The Journal of Biological Chemistry* 288 (26):  
821 18939–46. <https://doi.org/10.1074/jbc.M113.454470>.
- 822 Rechsteiner, M, and S W Rogers. 1996. “PEST Sequences and Regulation by Proteolysis.”  
823 *Trends in Biochemical Sciences* 21 (7): 267–71.  
824 <http://www.ncbi.nlm.nih.gov/pubmed/8755249>.
- 825 Richter, J D, and L D Smith. n.d. “Reversible Inhibition of Translation by Xenopus Oocyte-  
826 Specific Proteins.” *Nature* 309 (5966): 378–80. Accessed June 9, 2019.  
827 <http://www.ncbi.nlm.nih.gov/pubmed/6727992>.
- 828 Rose, Christopher M., Marta Isasa, Alban Ordureau, Miguel A. Prado, Sean A. Beausoleil,  
829 Mark P. Jedrychowski, Daniel J. Finley, J. Wade Harper, and Steven P. Gygi. 2016.

- 830 “Highly Multiplexed Quantitative Mass Spectrometry Analysis of Ubiquitylomes.” *Cell*  
831 *Systems* 3 (4): 395–403.e4. <https://doi.org/10.1016/j.cels.2016.08.009>.
- 832 Schitteck, Birgit, and Tobias Sinnberg. 2014. “Biological Functions of Casein Kinase 1 Isoforms  
833 and Putative Roles in Tumorigenesis.” *Molecular Cancer* 13 (1): 231.  
834 <https://doi.org/10.1186/1476-4598-13-231>.
- 835 Sheng, Yi, Vivian Saridakis, Feroz Sarkari, Shili Duan, Tianne Wu, Cheryl H Arrowsmith, and  
836 Lori Frappier. 2006. “Molecular Recognition of P53 and MDM2 by USP7/HAUSP.” *Nature*  
837 *Structural & Molecular Biology* 13 (3): 285–91. <https://doi.org/10.1038/nsmb1067>.
- 838 Soncini, Chiara, Ingrid Berdo, and Giulio Draetta. 2001. “Ras–GAP SH3 Domain Binding  
839 Protein (G3BP) Is a Modulator of USP10, a Novel Human Ubiquitin Specific Protease.”  
840 *Oncogene* 20 (29): 3869–79. <https://doi.org/10.1038/sj.onc.1204553>.
- 841 Sowa, Mathew E., Eric J. Bennett, Steven P. Gygi, and J. Wade Harper. 2009. “Defining the  
842 Human Deubiquitinating Enzyme Interaction Landscape.” *Cell* 138 (2): 389–403.  
843 <https://doi.org/10.1016/j.cell.2009.04.042>.
- 844 Swatek, Kirby N, and David Komander. 2016. “Ubiquitin Modifications.” *Cell Research* 26 (4):  
845 399–422. <https://doi.org/10.1038/cr.2016.39>.
- 846 Vaz, Bruno, Marta Popovic, Joseph A. Newman, John Fielden, Hazel Aitkenhead, Swagata  
847 Halder, Abhay Narayan Singh, et al. 2016. “Metalloprotease SPRTN/DVC1 Orchestrates  
848 Replication-Coupled DNA-Protein Crosslink Repair.” *Molecular Cell* 64 (4): 704–19.  
849 <https://doi.org/10.1016/j.molcel.2016.09.032>.
- 850 Ventii, Karen H, and Keith D Wilkinson. 2008. “Protein Partners of Deubiquitinating Enzymes.”  
851 *The Biochemical Journal* 414 (2): 161–75. <https://doi.org/10.1042/BJ20080798>.
- 852 Wang, Tao, Luming Yin, Eric M. Cooper, Ming-Yih Lai, Seth Dickey, Cecile M. Pickart, David

- 853 Fushman, Keith D. Wilkinson, Robert E. Cohen, and Cynthia Wolberger. 2009. “Evidence  
854 for Bidentate Substrate Binding as the Basis for the K48 Linkage Specificity of Otubain 1.”  
855 *Journal of Molecular Biology* 386 (4): 1011–23. <https://doi.org/10.1016/j.jmb.2008.12.085>.
- 856 Wühr, Martin, Robert M Freeman, Marc Presler, Marko E Horb, Leonid Peshkin, Steven Gygi,  
857 Marc W Kirschner, and Marc W Kirschner. 2014. “Deep Proteomics of the *Xenopus Laevis*  
858 Egg Using an mRNA-Derived Reference Database.” *Current Biology : CB* 24 (13): 1467–  
859 75. <https://doi.org/10.1016/j.cub.2014.05.044>.
- 860 Yardimci, Hasan, Anna B. Loveland, Antoine M. van Oijen, and Johannes C. Walter. 2012.  
861 “Single-Molecule Analysis of DNA Replication in *Xenopus* Egg Extracts.” *Methods* 57 (2):  
862 179–86. <https://doi.org/10.1016/j.ymeth.2012.03.033>.
- 863 Ye, Yihong, and Michael Rape. 2009. “Building Ubiquitin Chains: E2 Enzymes at Work.”  
864 *Nature Reviews. Molecular Cell Biology* 10 (11): 755–64. <https://doi.org/10.1038/nrm2780>.
- 865 Ye, Yu, Masato Akutsu, Francisca Reyes-Turcu, Radoslav I Enchev, Keith D Wilkinson, and  
866 David Komander. 2011. “Polyubiquitin Binding and Cross-reactivity in the USP Domain  
867 Deubiquitinase USP21.” *EMBO Reports* 12 (4): 350–57.  
868 <https://doi.org/10.1038/embor.2011.17>.
- 869 Zeng, Xing, Frederic Sigoillot, Shantanu Gaur, Sungwoon Choi, Kathleen L. Pfaff, Dong-Chan  
870 Oh, Nathaniel Hathaway, Nevena Dimova, Gregory D. Cuny, and Randall W. King. 2010.  
871 “Pharmacologic Inhibition of the Anaphase-Promoting Complex Induces a Spindle  
872 Checkpoint-Dependent Mitotic Arrest in the Absence of Spindle Damage.” *Cancer Cell* 18  
873 (4): 382–95. <https://doi.org/10.1016/j.ccr.2010.08.010>.

874

875 **Acknowledgments**

876 We gratefully acknowledge W. Harper for the gift of plasmids from the ORFeome collection, S.  
877 Buhrlage for the gift of XL-188 and XL-203 and D. Finley for the gift of IU-C, IU-47 and USP21.  
878 We thank Sandhya Manohar for the help in preparing the *Xenopus* egg extract. We thank W. Har-  
879 per for helpful discussions. This work was supported by NIH grants R01 GM132129 (J.A.P.), R01  
880 GM67945 (S.P.G) and R35 GM127032 (R.W.K.).

#### 881 **Author contributions**

882 V.R. designed, performed, and analyzed all the experiments  
883 V.R. prepared all samples for mass spectrometry with assistance from J.P.  
884 J.P., J.C. and S.P.G. performed mass spectrometric analysis and provide reagents  
885 B.B. provided advice on DUB selection and DUB assays  
886 R.W.K. assisted with experimental design  
887 V.R. and R.W.K. conceived of the project and wrote the manuscript with input from the other  
888 authors.

#### 889 **Competing interests**

890 The authors declare no competing interests

#### 891 **Data availability**

892 The mass spectrometry proteomics data have been deposited to the ProteomeXchange Consortium via the  
893 PRIDE partner repository with the dataset identifier ....

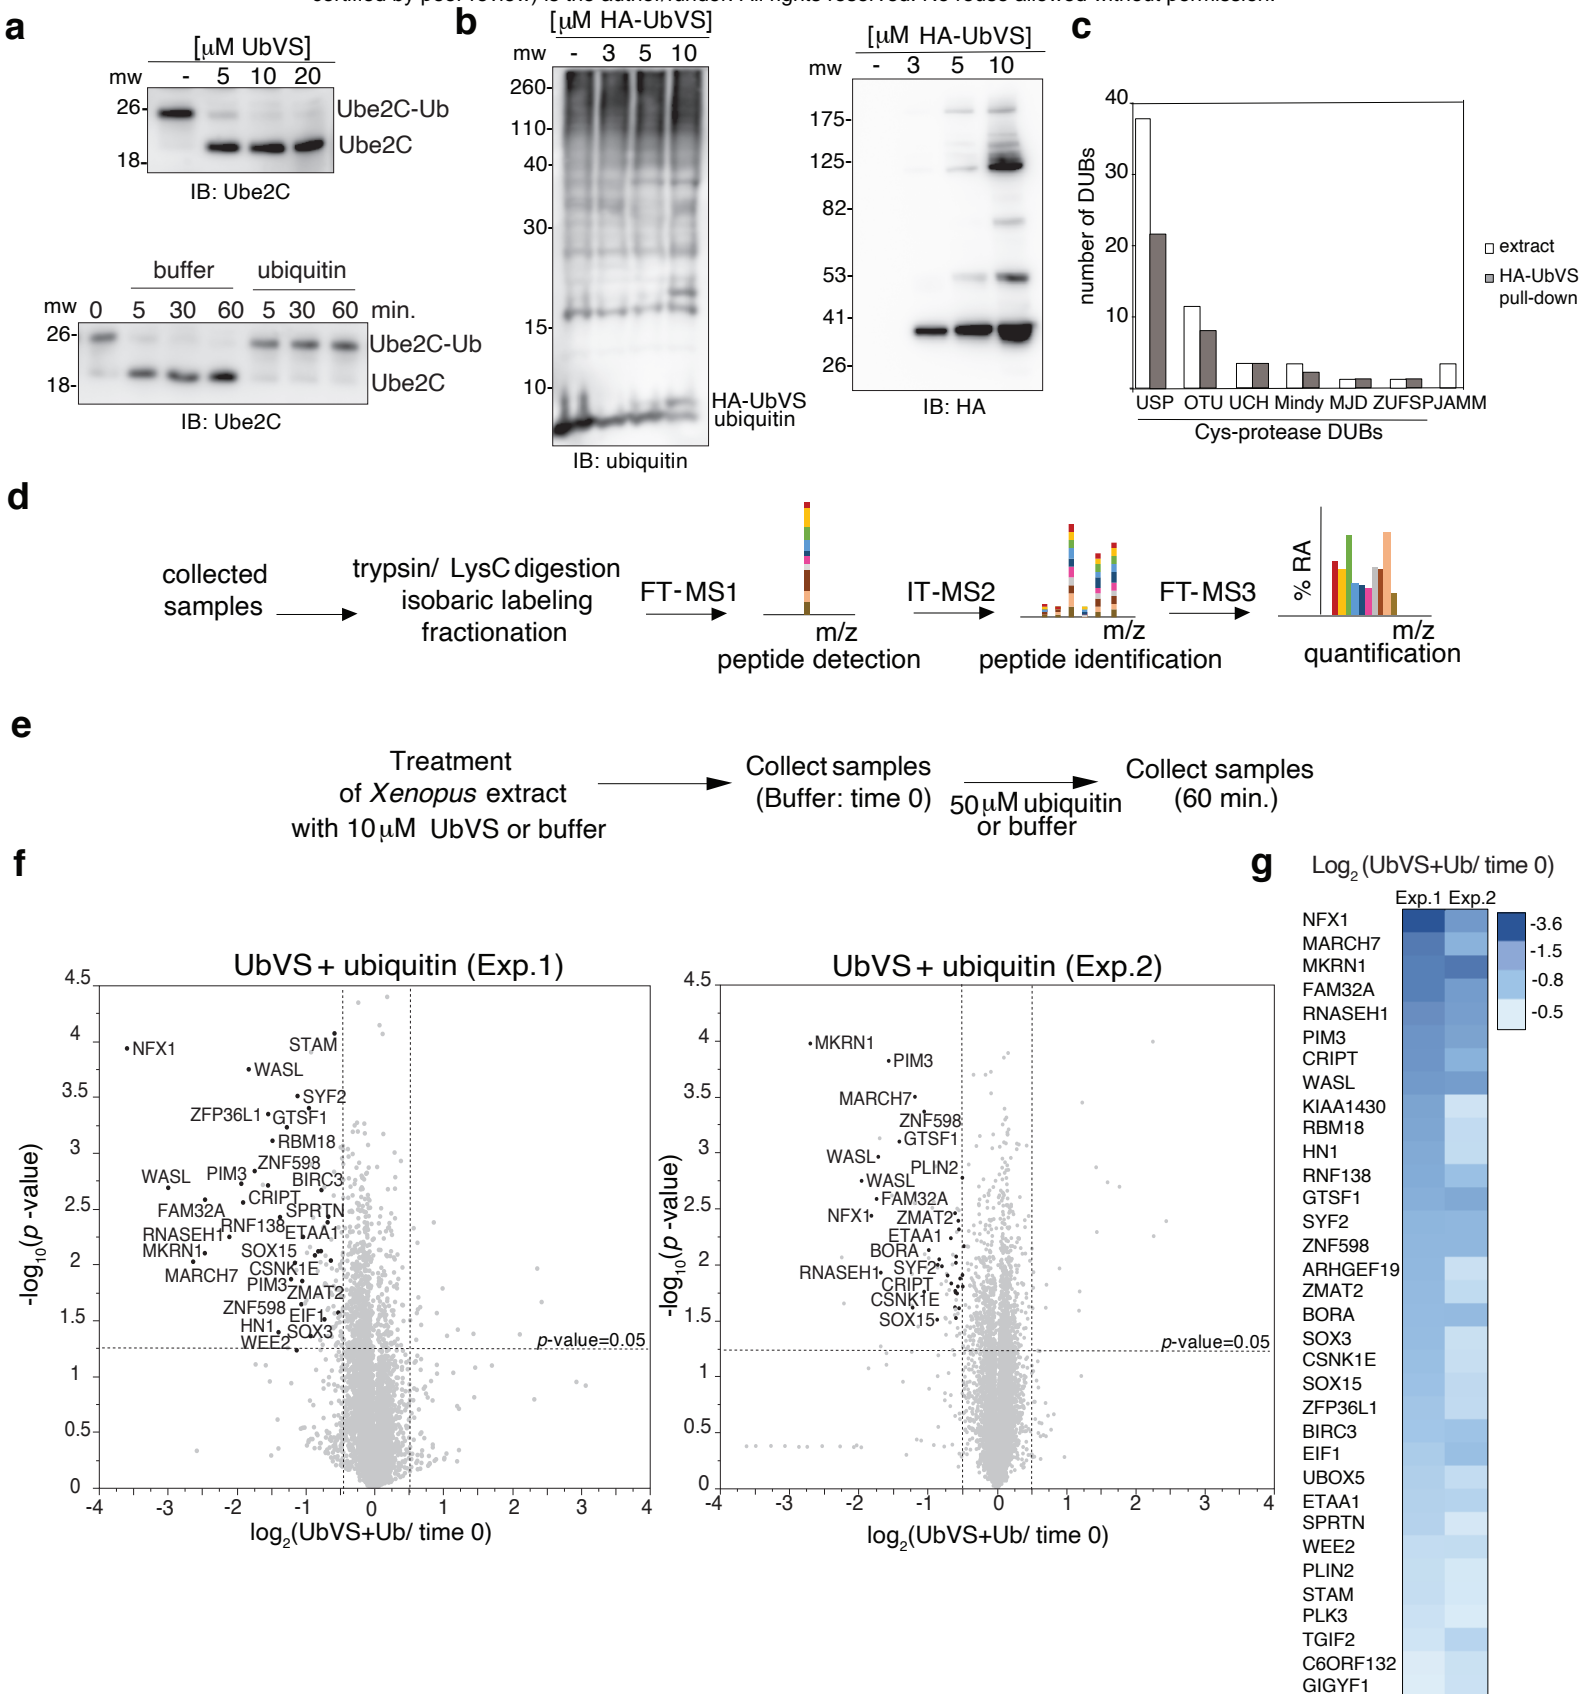



**a**

| Proteins                                                                                            | Function                 |
|-----------------------------------------------------------------------------------------------------|--------------------------|
| <b>MKRN1</b> UBOX5 (putative)<br><b>MARCH7</b> <b>RNF138</b> BIRC3<br>NFX1 (putative) ZNF598        | UPS (E3s)                |
| <b>RBM18</b> <b>SYF2</b> EIF1 FAM32A<br><b>ZMAT2</b> RNASEH1 ZFP36L1                                | RNA metabolism           |
| SOX3 SOX15 TGIF2 GTSF1                                                                              | Transcription factors    |
| <b>CRIP1</b> ARHGEF19 KIAA1430<br>WASL                                                              | Cytoskeleton             |
| BORA WEE2 <b>PIM3</b> GIGYF1<br>HN1 PLK3                                                            | Proliferation/cell death |
| SPRTN ETAA1                                                                                         | DNA damage               |
| <b>STAM</b> (trafficking) <b>CSNK1E</b><br>(circadian period) PLIN2 (lipid storage)<br>C6ORF132 (?) | Others                   |

**b**

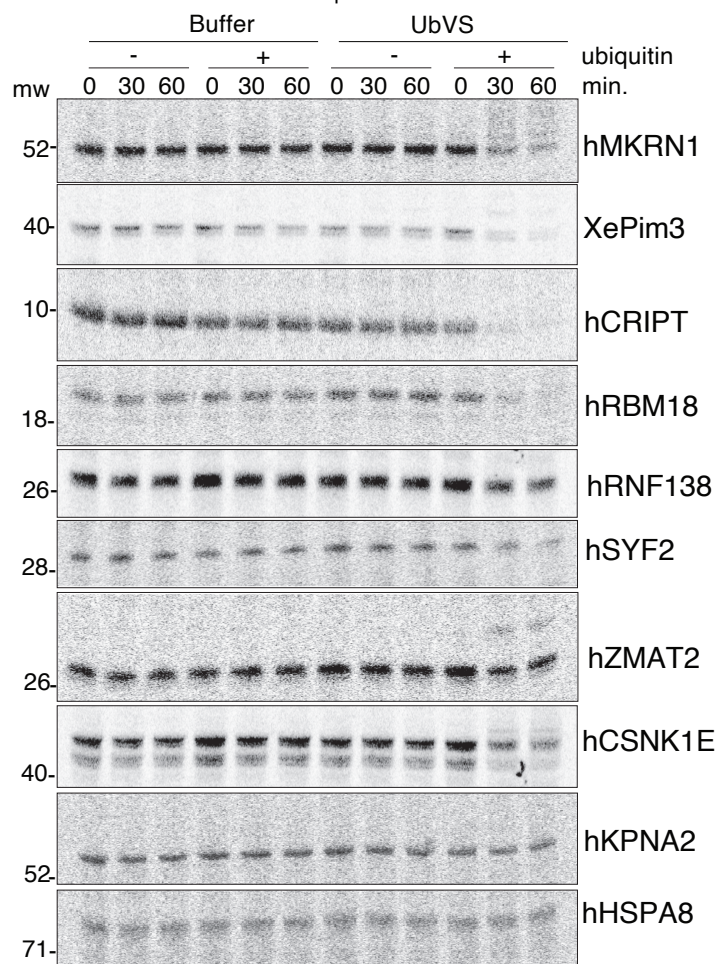

**c**

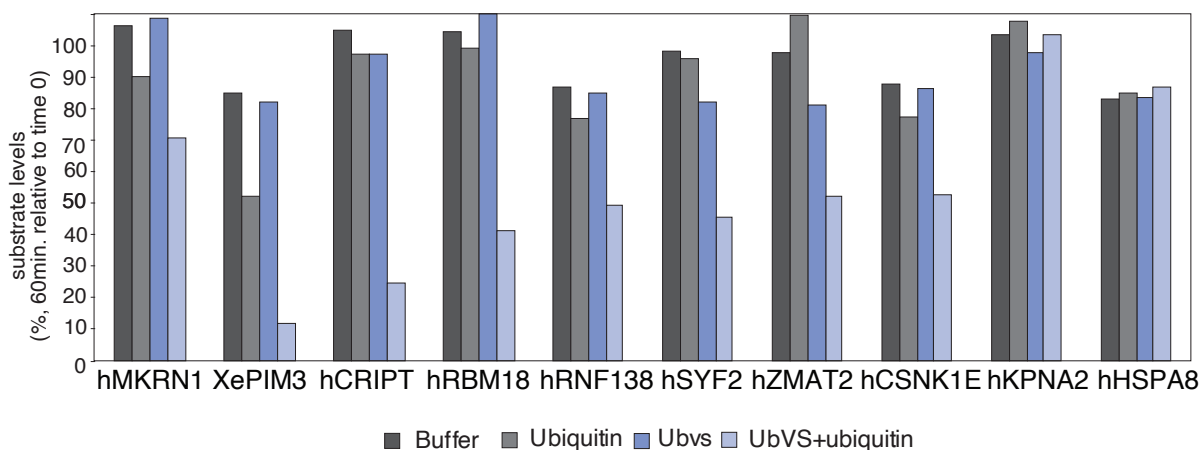

**d**

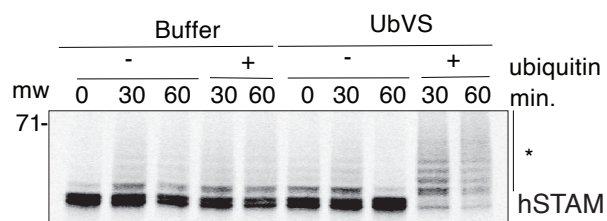

**Fig. 2 Independent validation of the proteins protected from degradation by UbVS-sensitive DUBs** (a) Functions of the proteins down-regulated in UbVS/ubiquitin-treated extract (Fig. 1g). Proteins independently validated are in bold. (b) Human orthologs (prefix h) or Xenopus protein (prefix Xe) were expressed in reticulocyte lysate, labeled with <sup>35</sup>S-methionine and added to the extract, treated as in Fig. 1e. Aliquots were collected and processed for SDS-PAGE and phosphorimaging. UbVS/ubiquitin-dependent degradation of these proteins was confirmed in 2 independent experiments. One of the experiments is shown (c) Quantification of the experiment in (b). Quantification of the second experiment is shown in Fig. S3d (d) Performed as in (b) \*: ubiquitylated species.



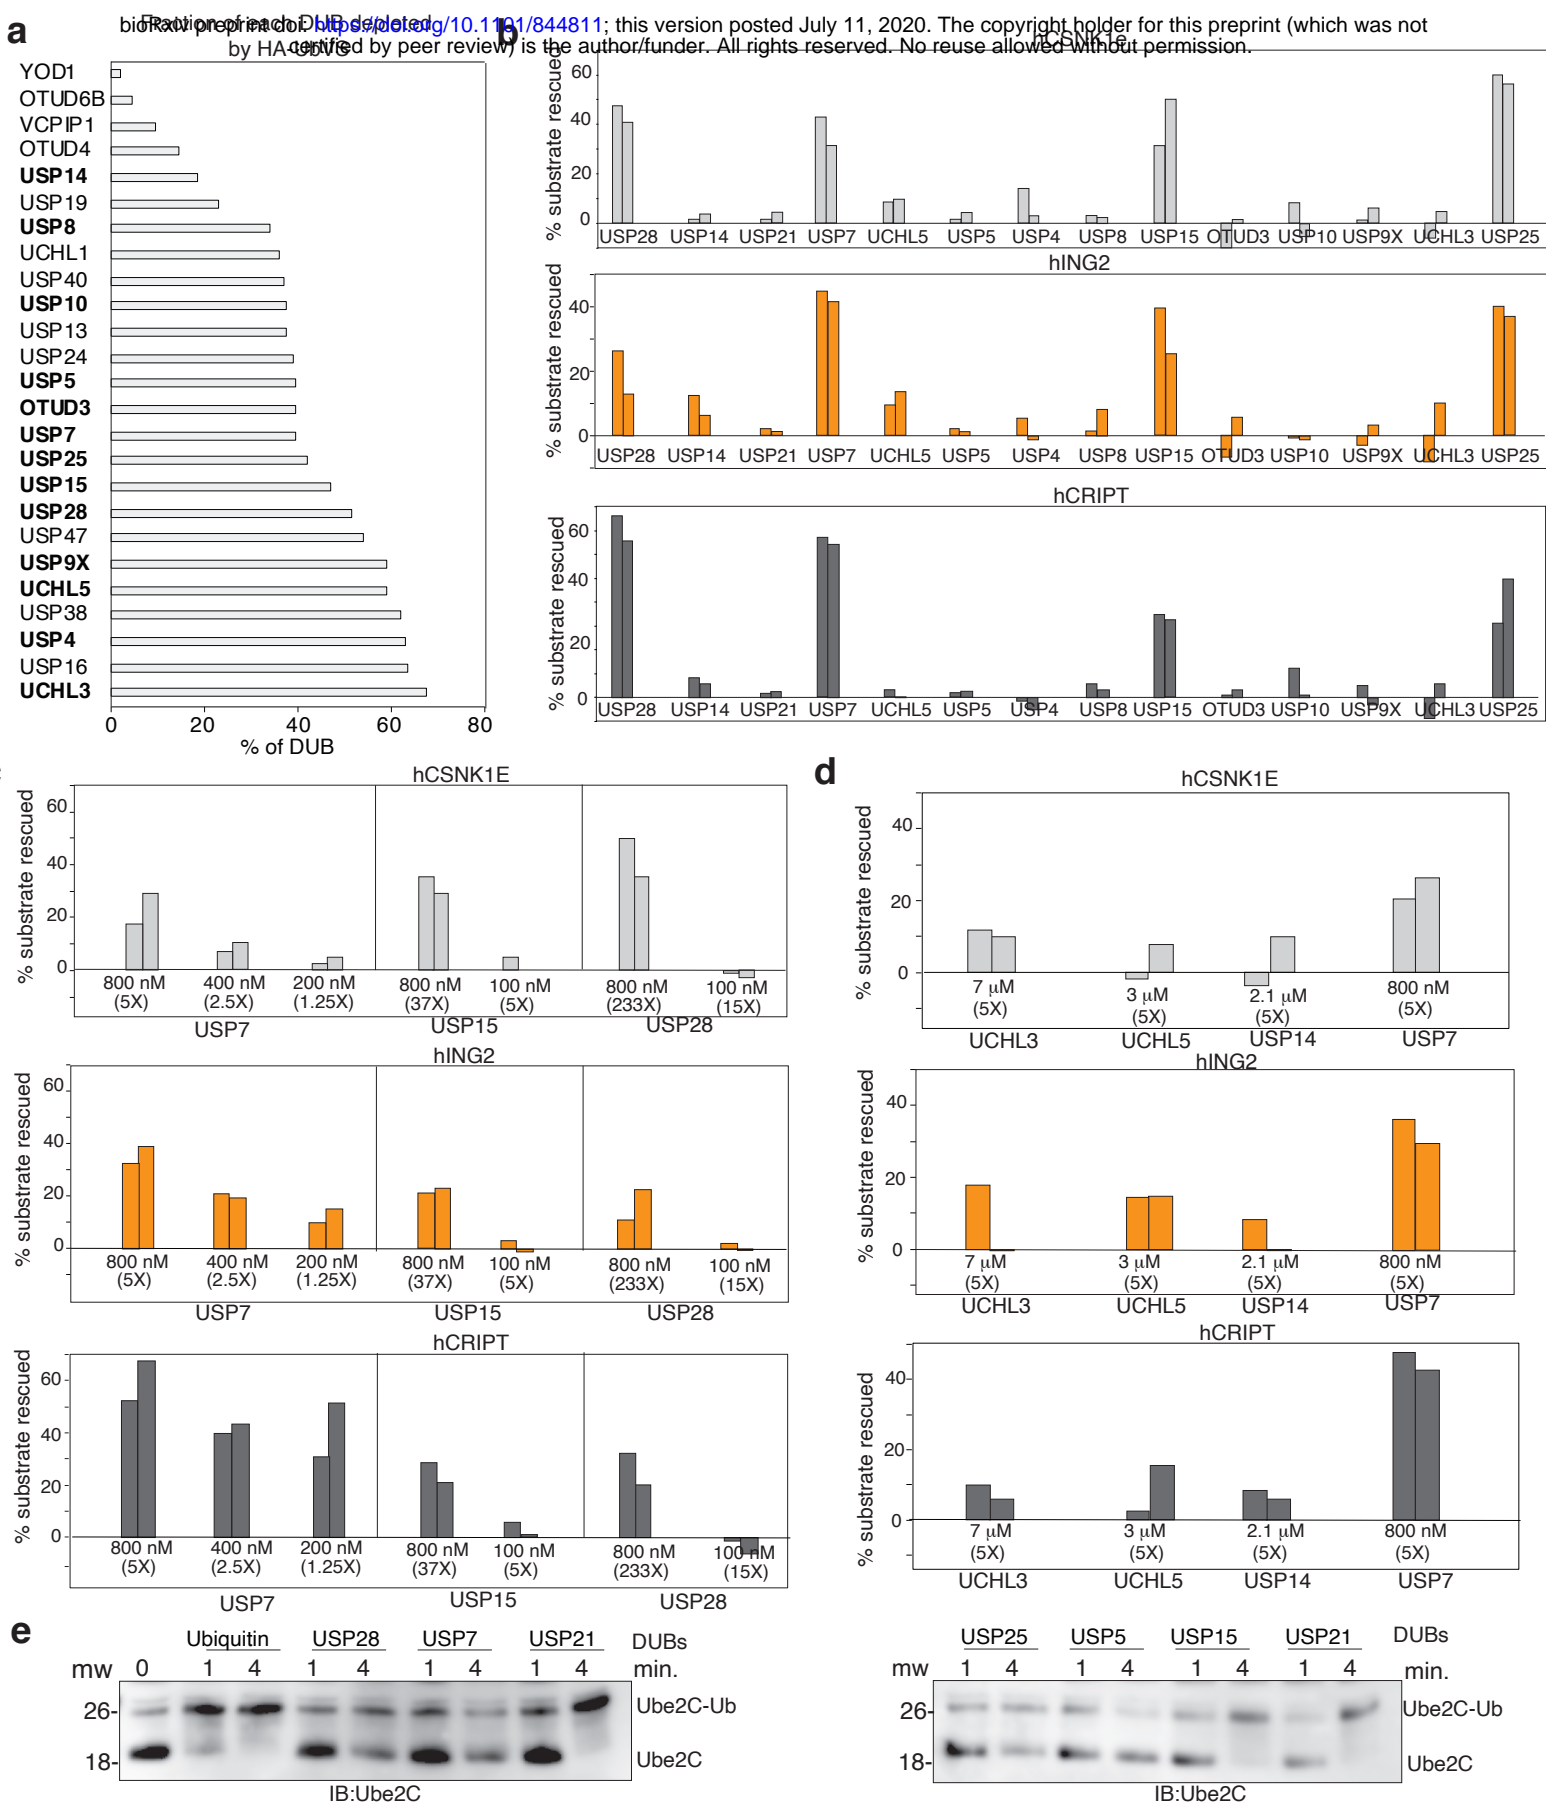

**Fig 3. Identification of DUBs sufficient to rescue degradation of the selected substrates in UbVS/ubiquitin-treated extract (a)** Percentage of DUBs depleted by HA-UbVS. Extract was treated with 10 $\mu$ M HA-UbVS (10 minutes) and incubated overnight with anti-HA or empty beads. Supernatants were analyzed in triplicate by the SL-TMT method. Bold: DUBs tested in subsequent experiments. **(b)** Extract was incubated with 10  $\mu$ M UbVS (30 minutes), after which recombinant DUBs (800 nM), labeled substrates and ubiquitin were added. After 60 minutes, aliquotes were processed for phosphorimaging. Quantitative profiles for 3 model substrates were created. The percentage of each substrate rescued by the addition of the DUBs is reported (two independent experiments). **(c)** Dose response analysis, performed as in **(b)**. The tested concentration is shown; the value in parentheses indicates the fold-increase of the tested concentration relative to the endogenous (two independent experiments). One representative experiment is shown in Fig. S6 **(c)** and **(d)** respectively. Performed as in **(b)** with the exception that ubiquitin was not added with the DUBs. Samples were processed for immunoblotting. Rossio et al., Fig3

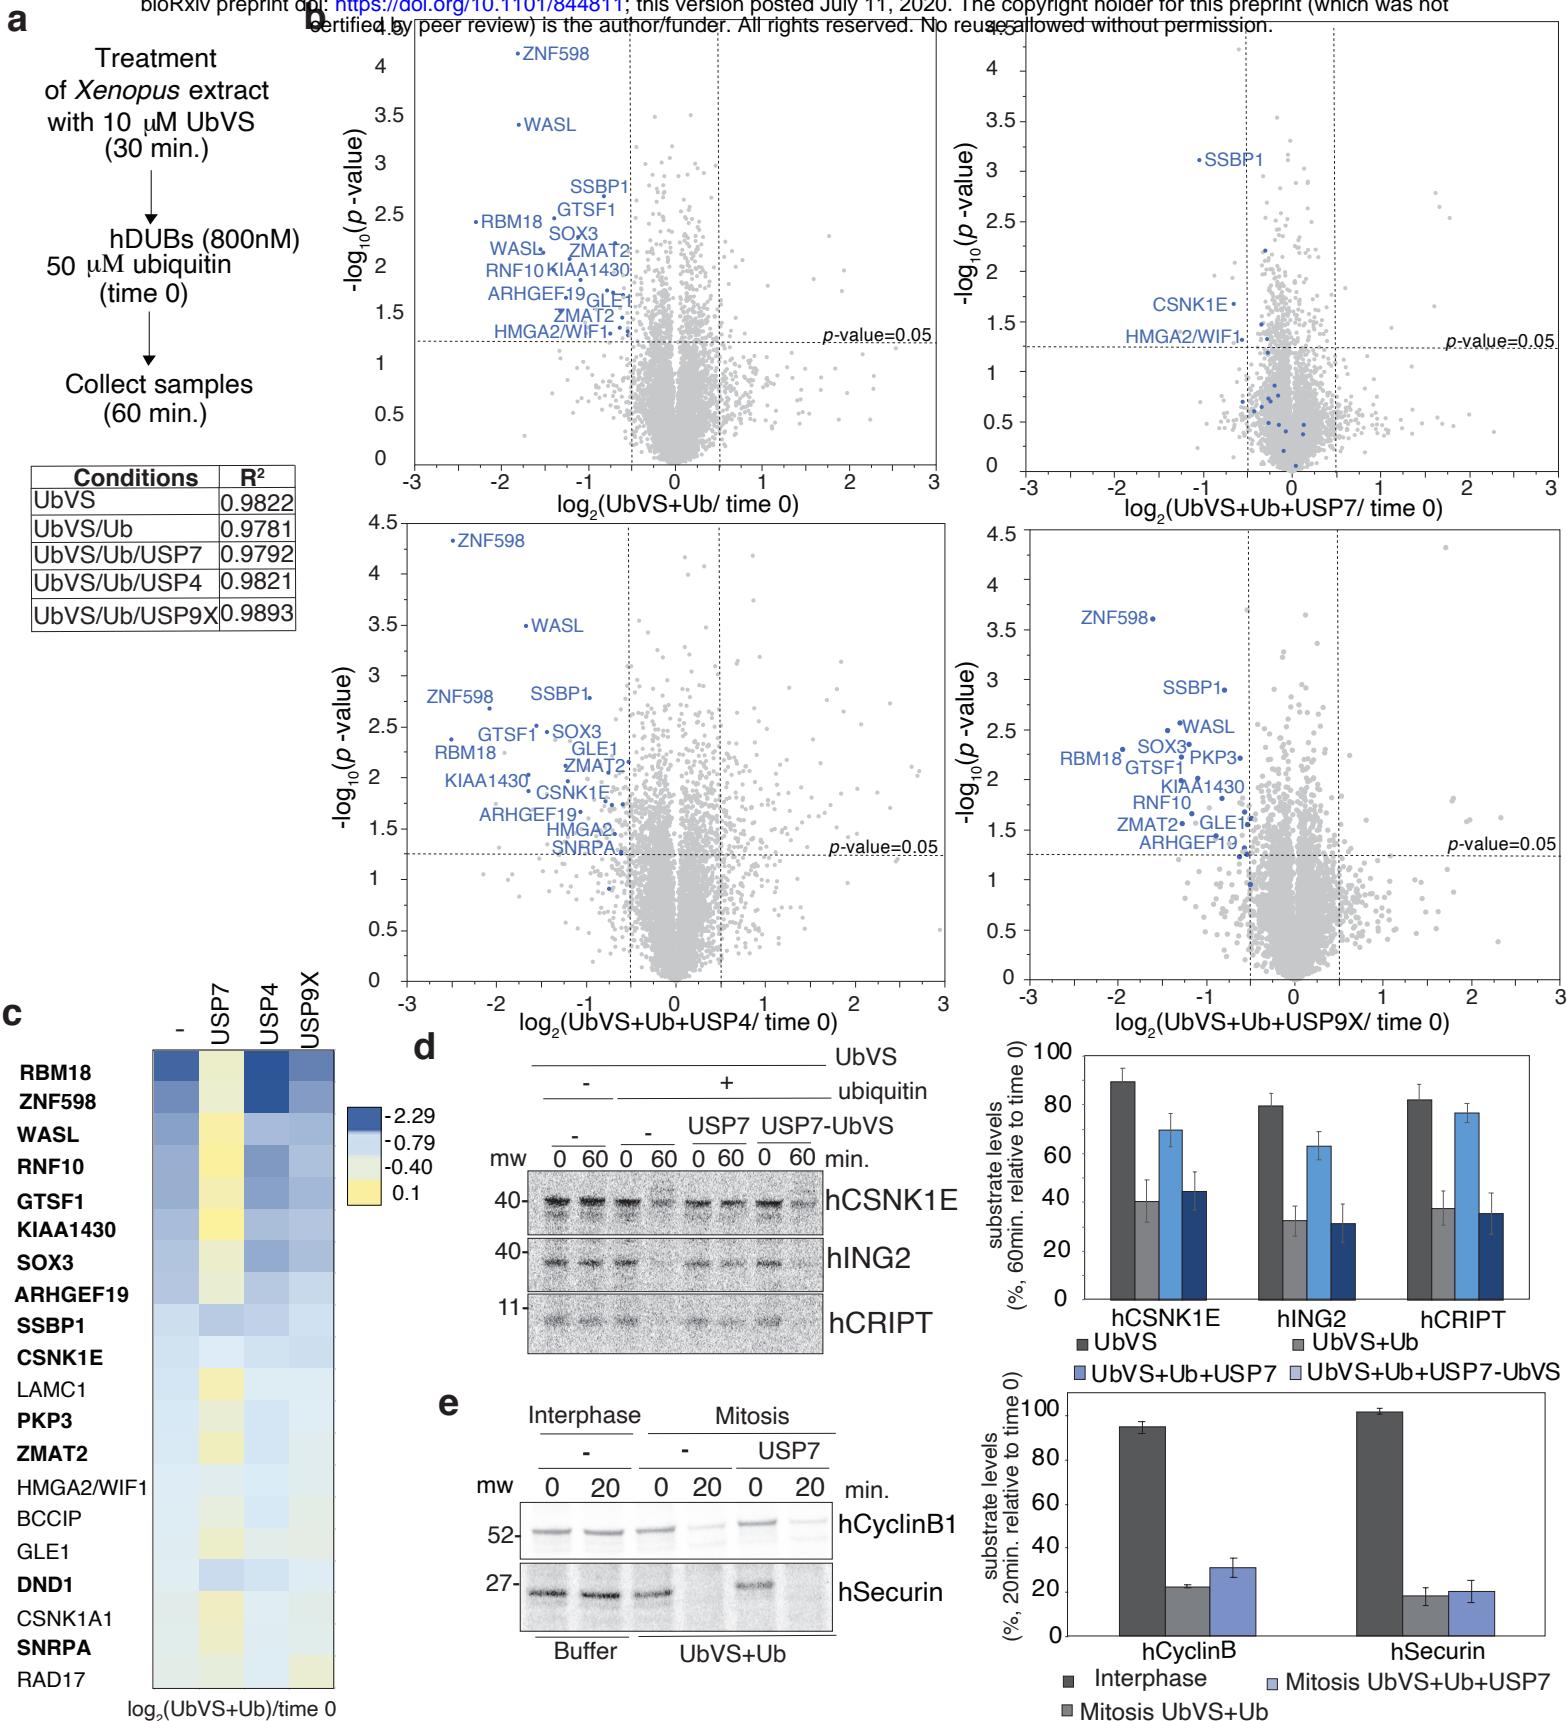

**Fig.4 USP7 broadly rescues substrates from degradation in UbVS/ubiquitin-treated extract** (a) Extract was incubated with UbVS followed by addition of DUBs and ubiquitin. Samples were analyzed by SL-TMT method. Bottom: R<sup>2</sup> of the technical replicates (b) Volcano plot of quantitative proteomics analysis comparing proteins detected in the different conditions. Statistical significance is plotted against the log transformed ratio of the samples collected in duplicate. Proteins significantly decreasing in UbVS/ubiquitin are in blue (c) Heat map of the proteins downregulated in UbVS/ubiquitin after addition of DUBs. Bold: Proteins decreasing in both experiments in Fig. 1f. (d) Extract was treated such as in (a) 35S-methionine labeled substrates were added (time 0). USP7 was pre-incubated (30 min.) with buffer or UbVS (USP7-UbVS). Right: Quantification. Error bars: SEM of three independent experiments. One representative experiment is shown. (e) 35S-methionine labeled substrates were added to interphase and mitotic extract incubated with UbVS (30 min.). USP7 and ubiquitin were added (time 0). Aliquots were collected and processed for phosphorimaging. Right: Quantification of the substrate present at 20 minutes Error bars: SEM of three independent experiments. One representative experiment is shown.

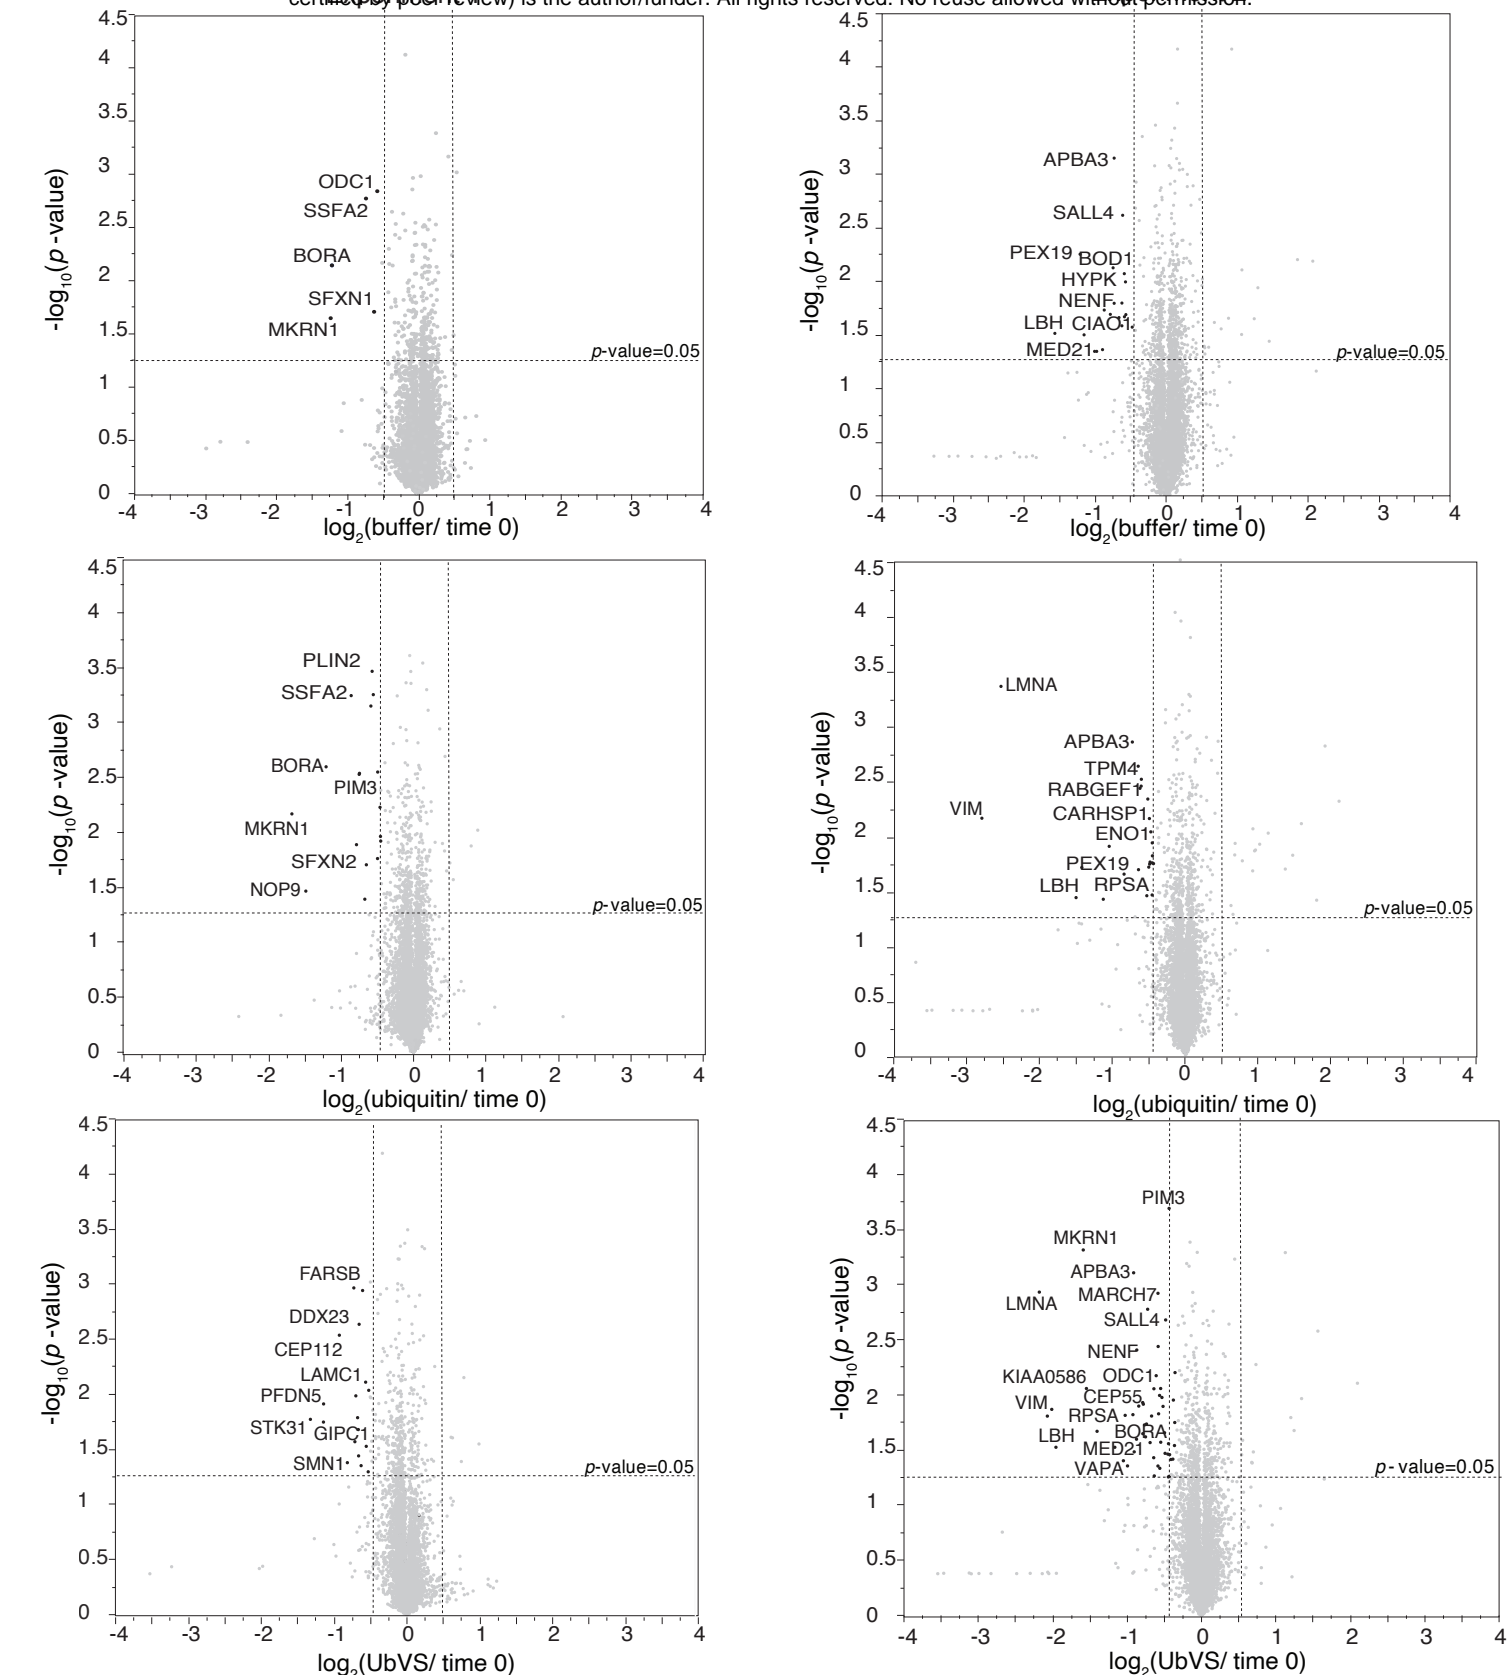

**Fig. S1 Analysis of the *Xenopus* proteome over time, after ubiquitin and UbVS addition.**(a)Volcano plot of the 2 proteomic experiments comparing protein abundance between the indicated conditions (60 minutes) and time 0 as in Fig. 1f. Statistical significance ( $-\log_{10} p\text{-value}$ ) is plotted against fold change (average  $\log_2$  ratio). Proteins significantly decreasing in the indicated conditions are in black. (b) R<sup>2</sup> of the technical replicates are reported.

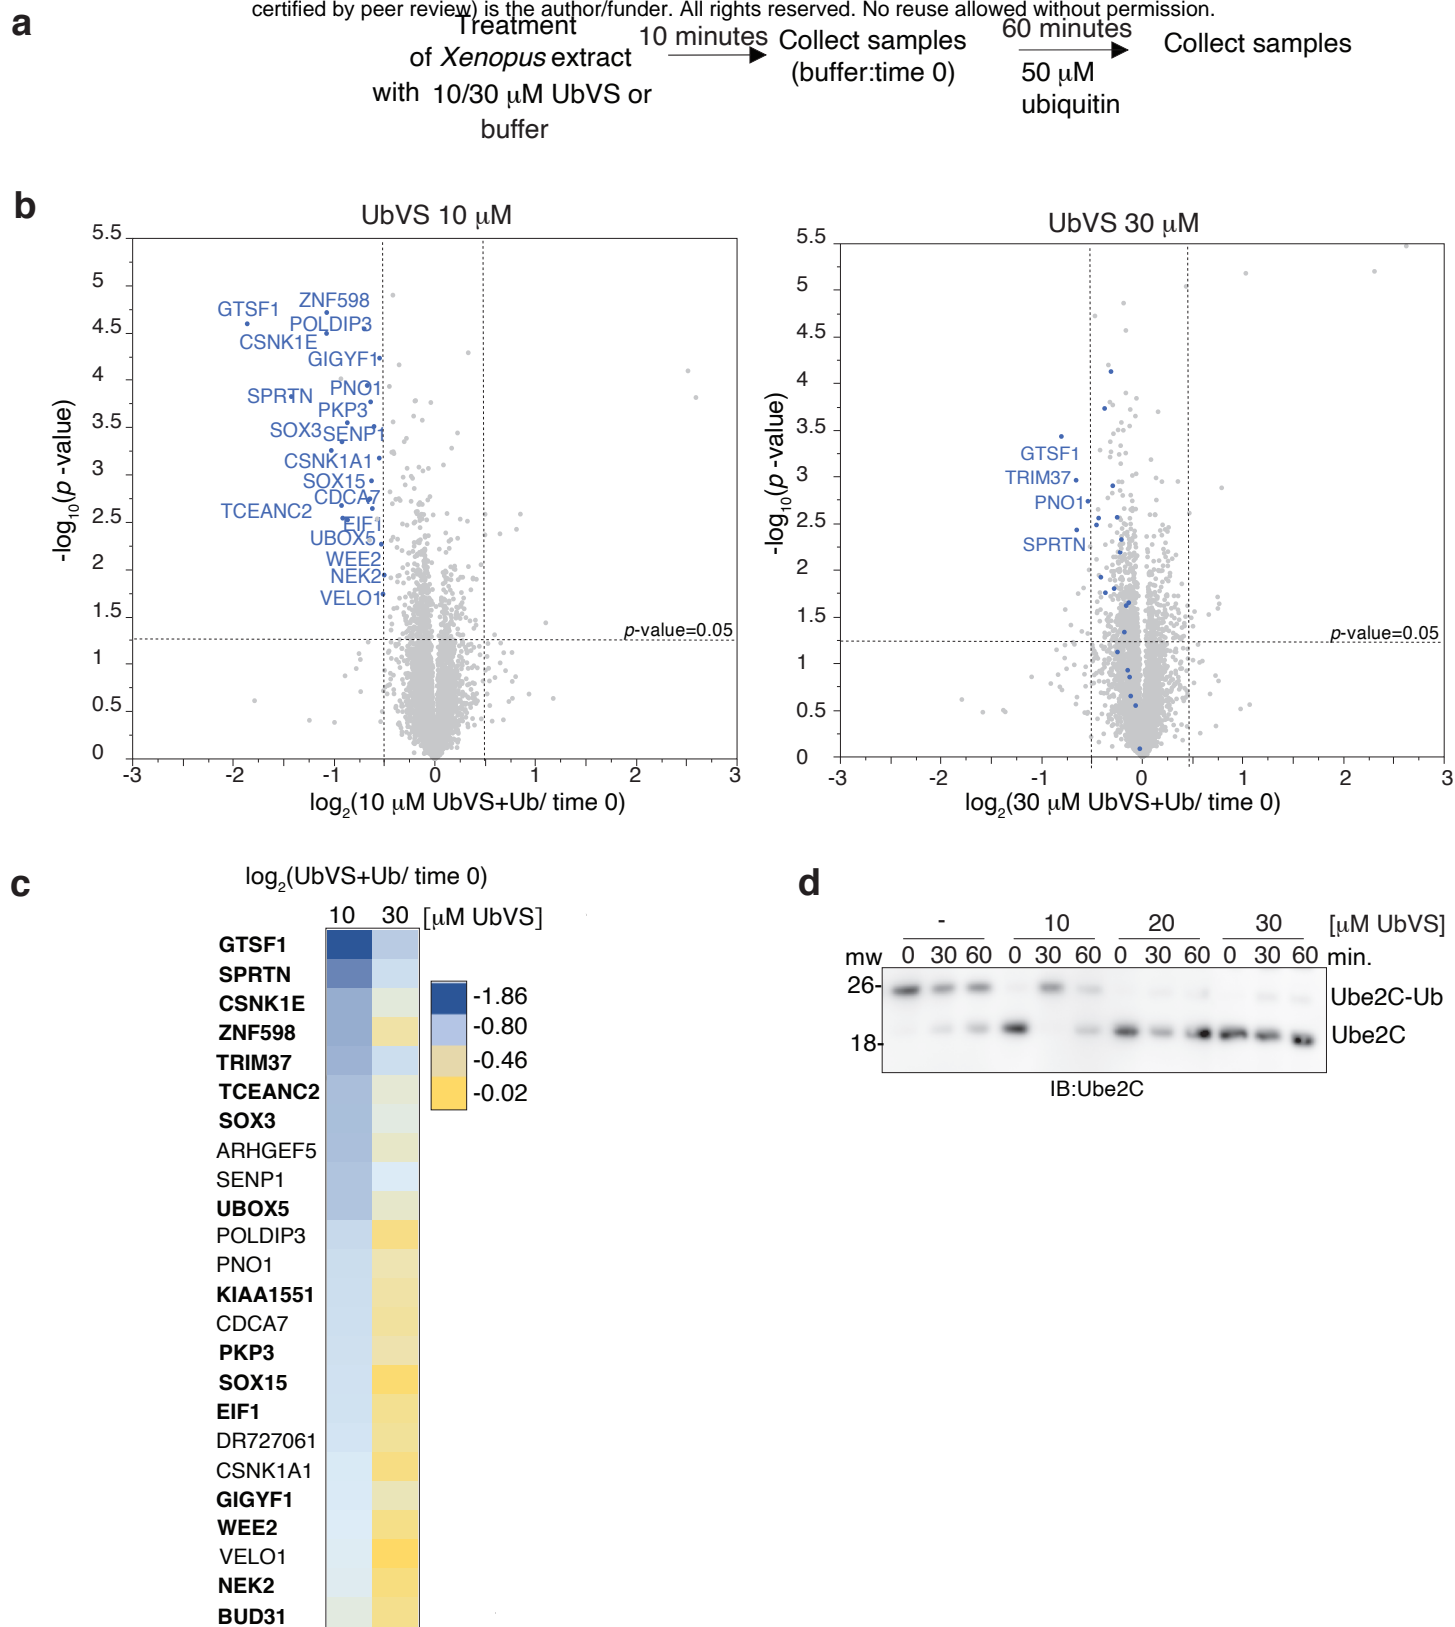

**Fig. S2 Increasing UbVS concentration does not enhance protein degradation in extract.** (a) Extract was incubated with buffer, 10 or 30  $\mu$ M UbVS (10 minutes) and 50  $\mu$ M of ubiquitin was added (time 0). Samples were collected in triplicate and processed for SL-TMT method analysis (b) Volcano plot of quantitative proteomics analysis. Statistical significance ( $-\log_{10} p\text{-value}$ ) is plotted against ratio (average  $\log_2$  ratio). Blue dots: proteins significantly decreasing in 10  $\mu$ M UbVS/ubiquitin (Fig. 1g) (c) Log<sub>2</sub> ratio heat map compares the proteins decreasing in (b). Proteins decreasing in the experiments in Fig. 1f are in bold. (d) Extract was treated with UbVS (10 minutes), after which 50  $\mu$ M of ubiquitin was added (time 0). Aliquots were subjected to immunoblotting.

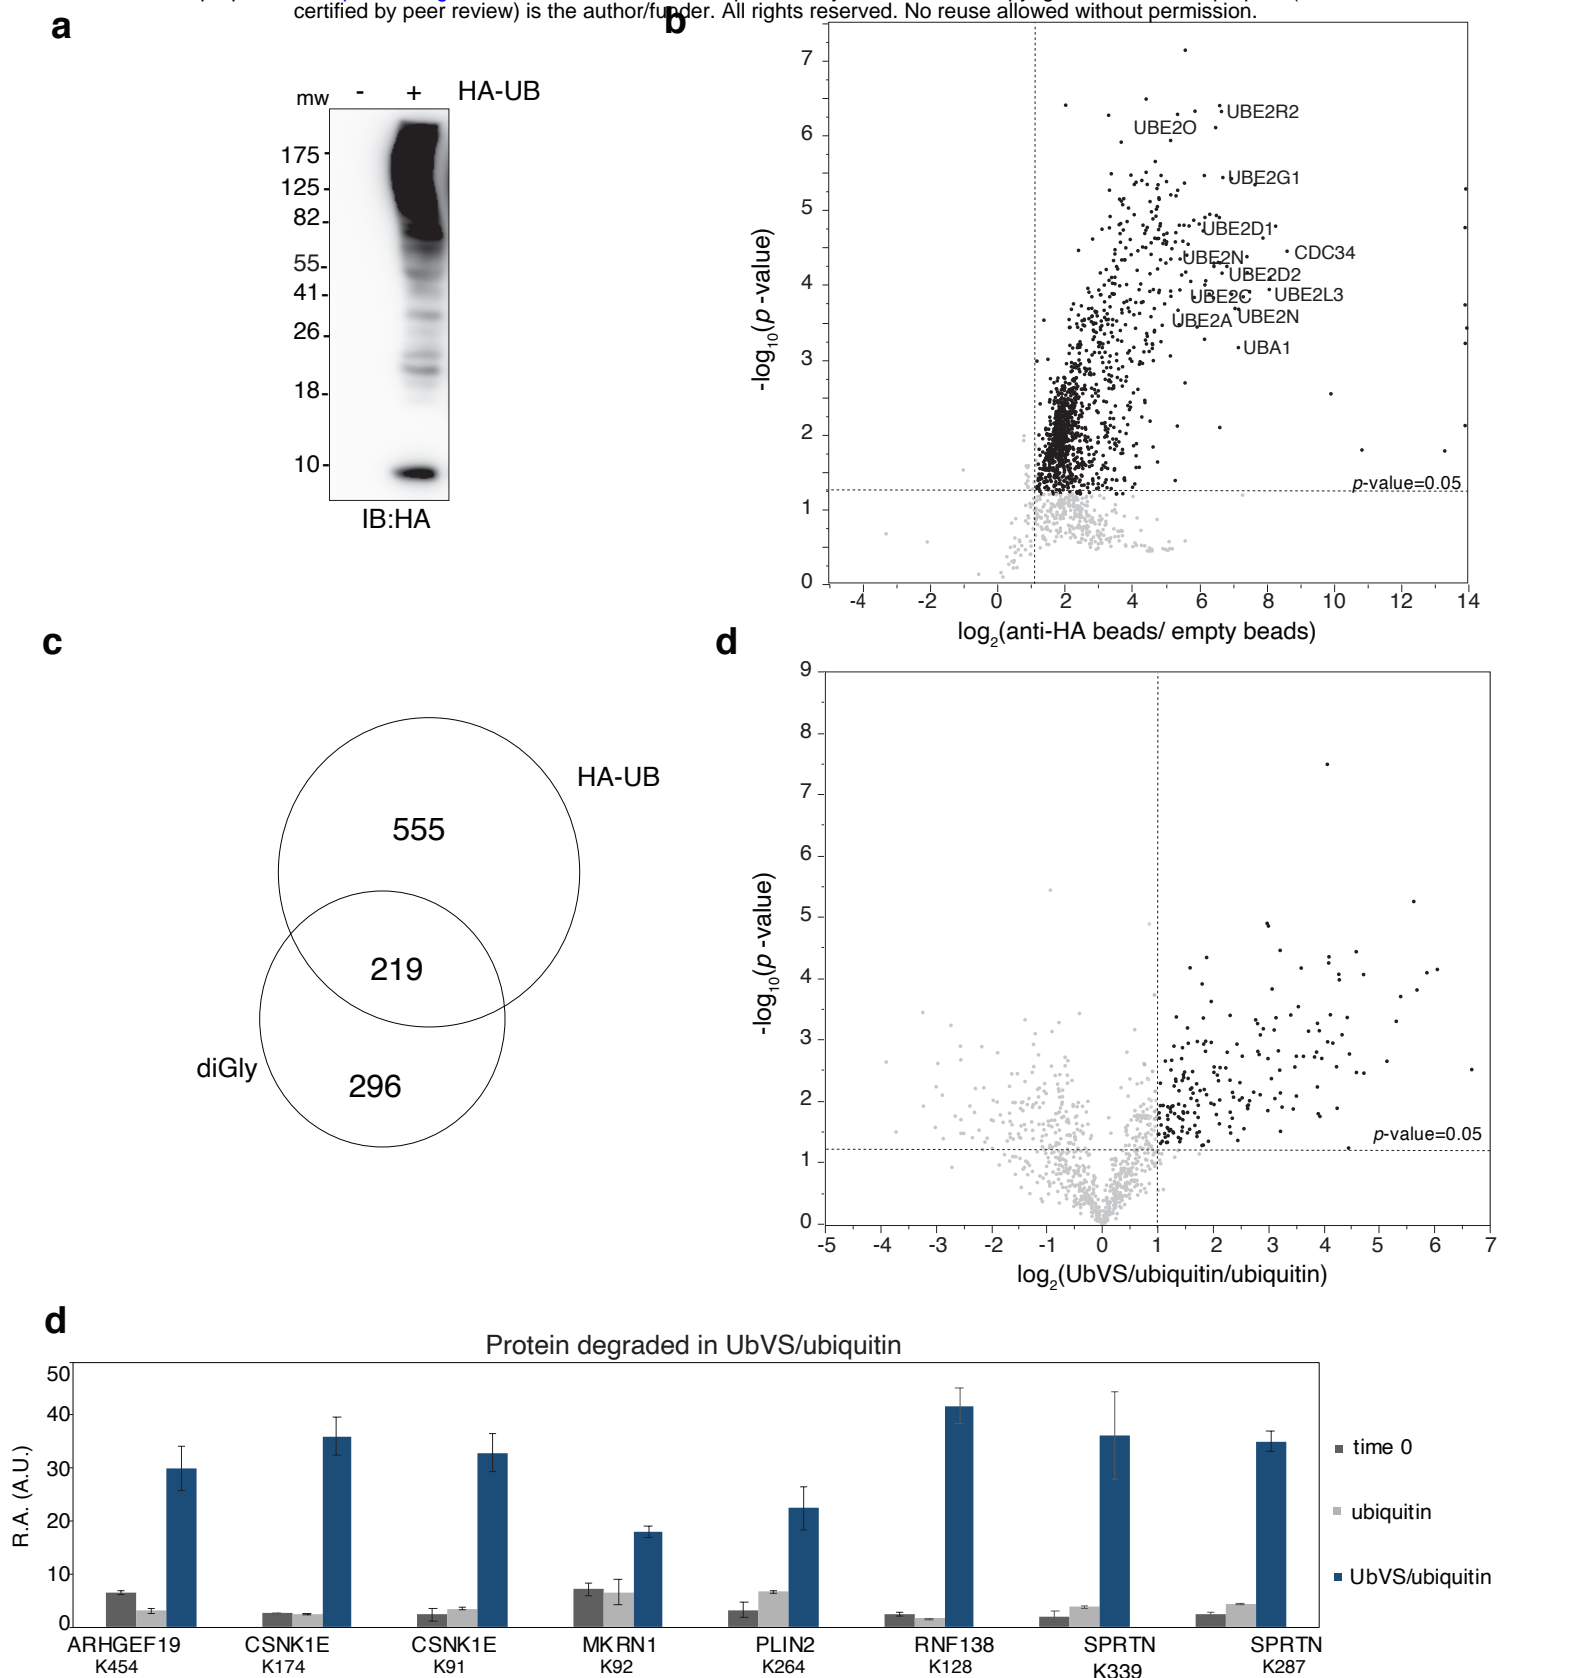

**Fig.S3 Identification of non-degradative substrate-ubiquitin conjugates** (a) Extract was treated with 50  $\mu$ M HA-ubiquitin (HA-UB) for 30 minutes and subjected to immunoblotting (IB) (b) After incubation with HA-ubiquitin, extract was subjected to anti-HA pull-down and analyzed by TMT-mass spectrometry. Volcano plot comparing abundance of protein bound to anti-HA beads relative to empty beads. Statistical significance ( $-\log_{10} p\text{-value}$ ) is plotted against ratio (average  $\log_2$ ). Samples were collected in technical triplicates. Proteins significantly increasing are in black. Abundant UPS components are labeled (c) Overlap between the HA-ubiquitin pull down and the diGly enrichment (d) Volcano plot of the TMT diGly remnant analysis comparing changes in ubiquitination sites detected after addition UbVS/ubiquitin to the changes after addition of only ubiquitin (30 min.). Samples were collected in duplicate. Statistical significance is plotted against ratio (average  $\log_2$ ). Proteins significantly increasing are in black. (e) Ubiquitination sites of the proteins destabilized in UbVS/ubiquitin (Fig.1f) are shown. The graph shows the relative amount (R.A.) of ubiquitination in the conditions tested (average between duplicates). A.U. Arbitrary unit. Error bars: standard deviation (N=2)

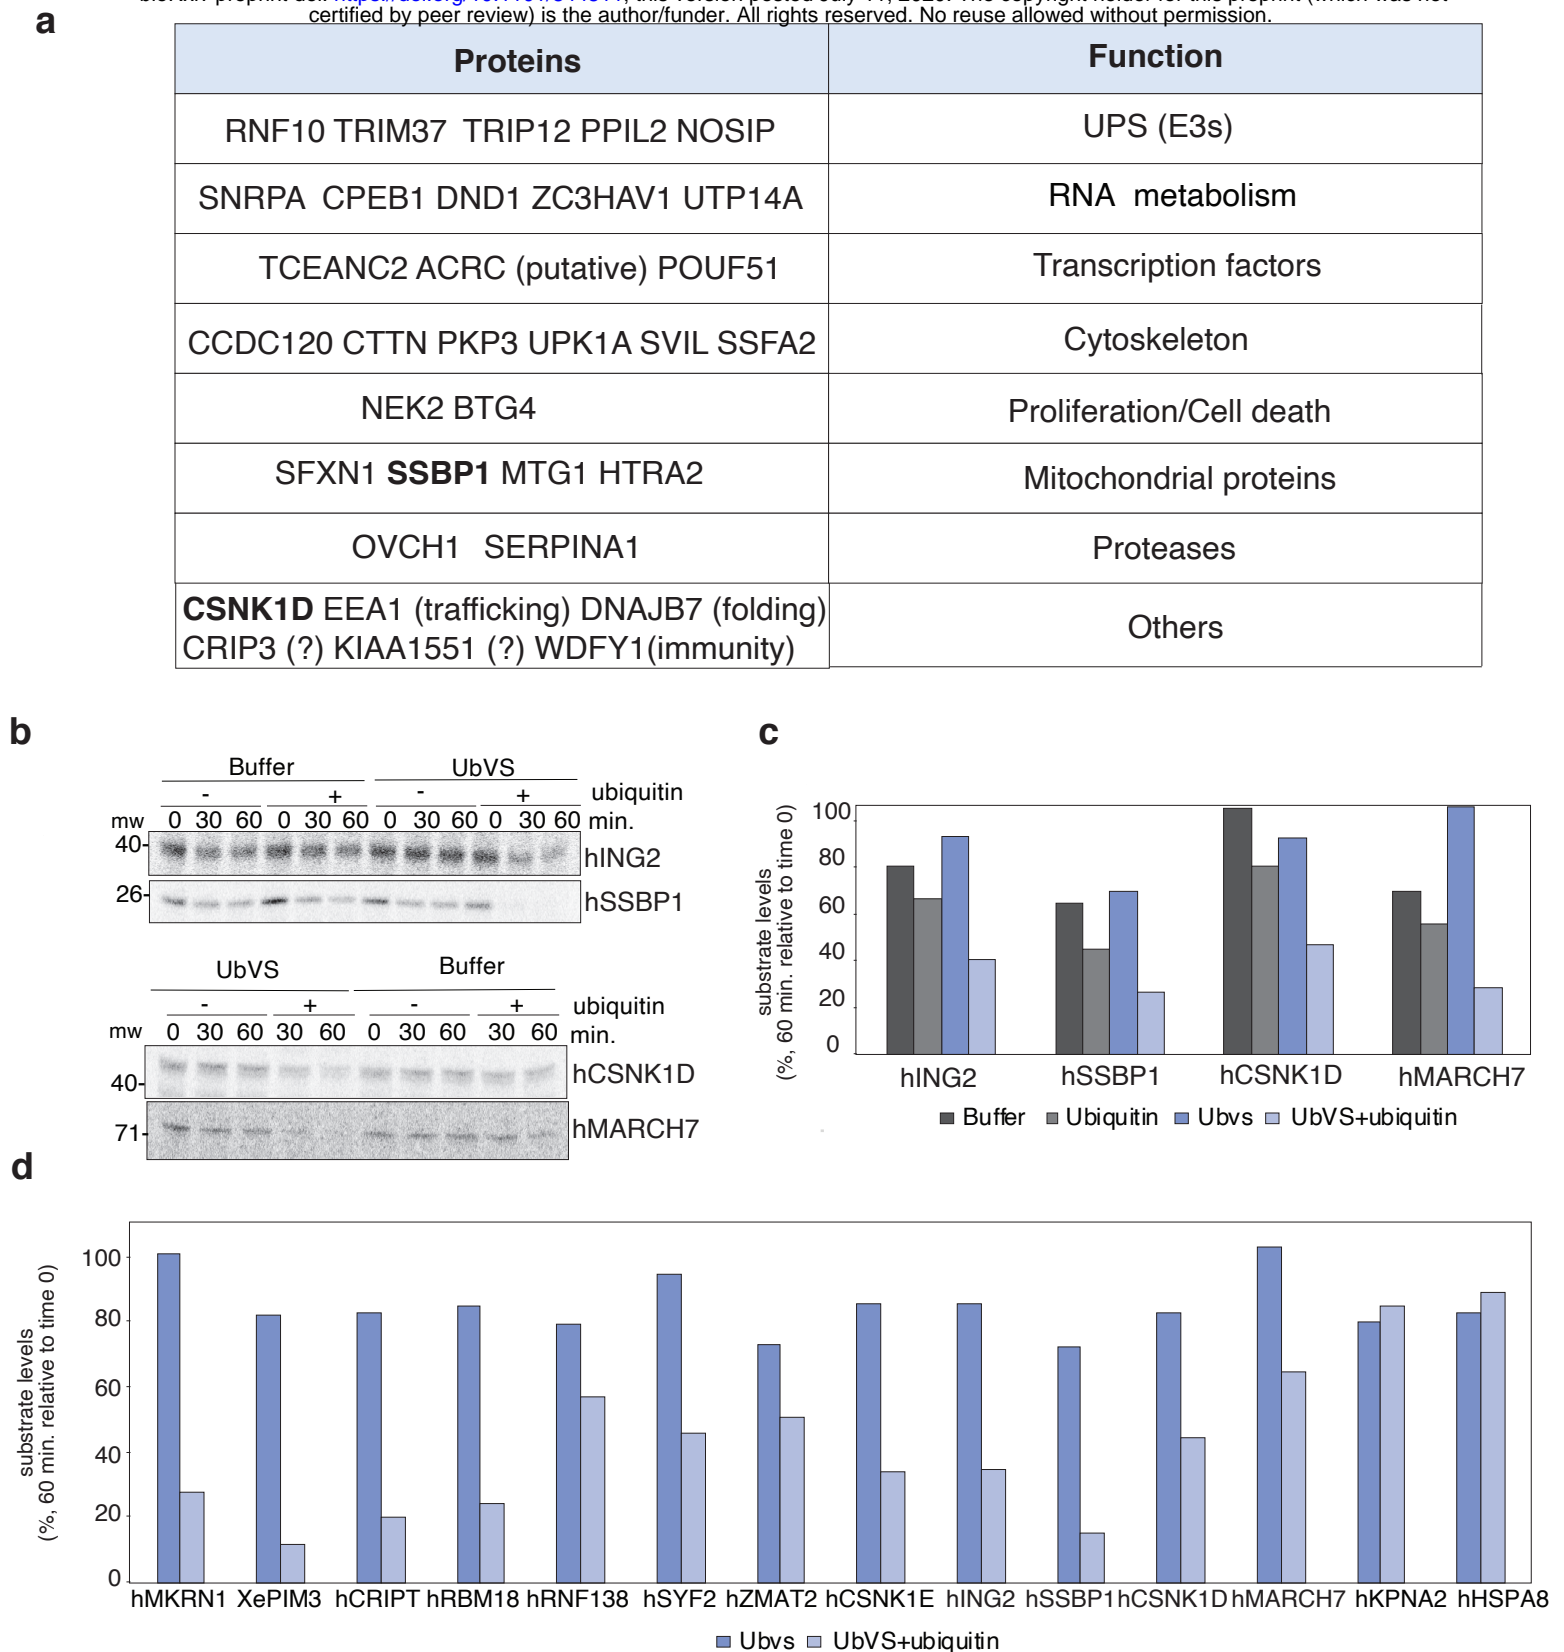

**Fig. S4 Validation of the substrates protected from degradation by the UbVS-sensitive DUBs** (a) Functions of the 5% of proteins whose abundance decreased most in UbVS/ubiquitin (FDR 1%) in both the experiments (Fig. 1f). The 34 proteins included in the more selective threshold are not shown. In bold, proteins validated with independent experiments. (b) The indicated proteins were expressed and labeled as described previously and added to extract pre-treated as indicated. Levels of the proteins were assessed by SDS-PAGE and phosphorimaging (c) Quantification of the substrate levels (60 minutes) of the experiment in (b). Substrates have been validated with 2 independent experiments. One representative experiment is shown. (d) Quantification of the second set of independent experiments in (c) and in Fig. 2.



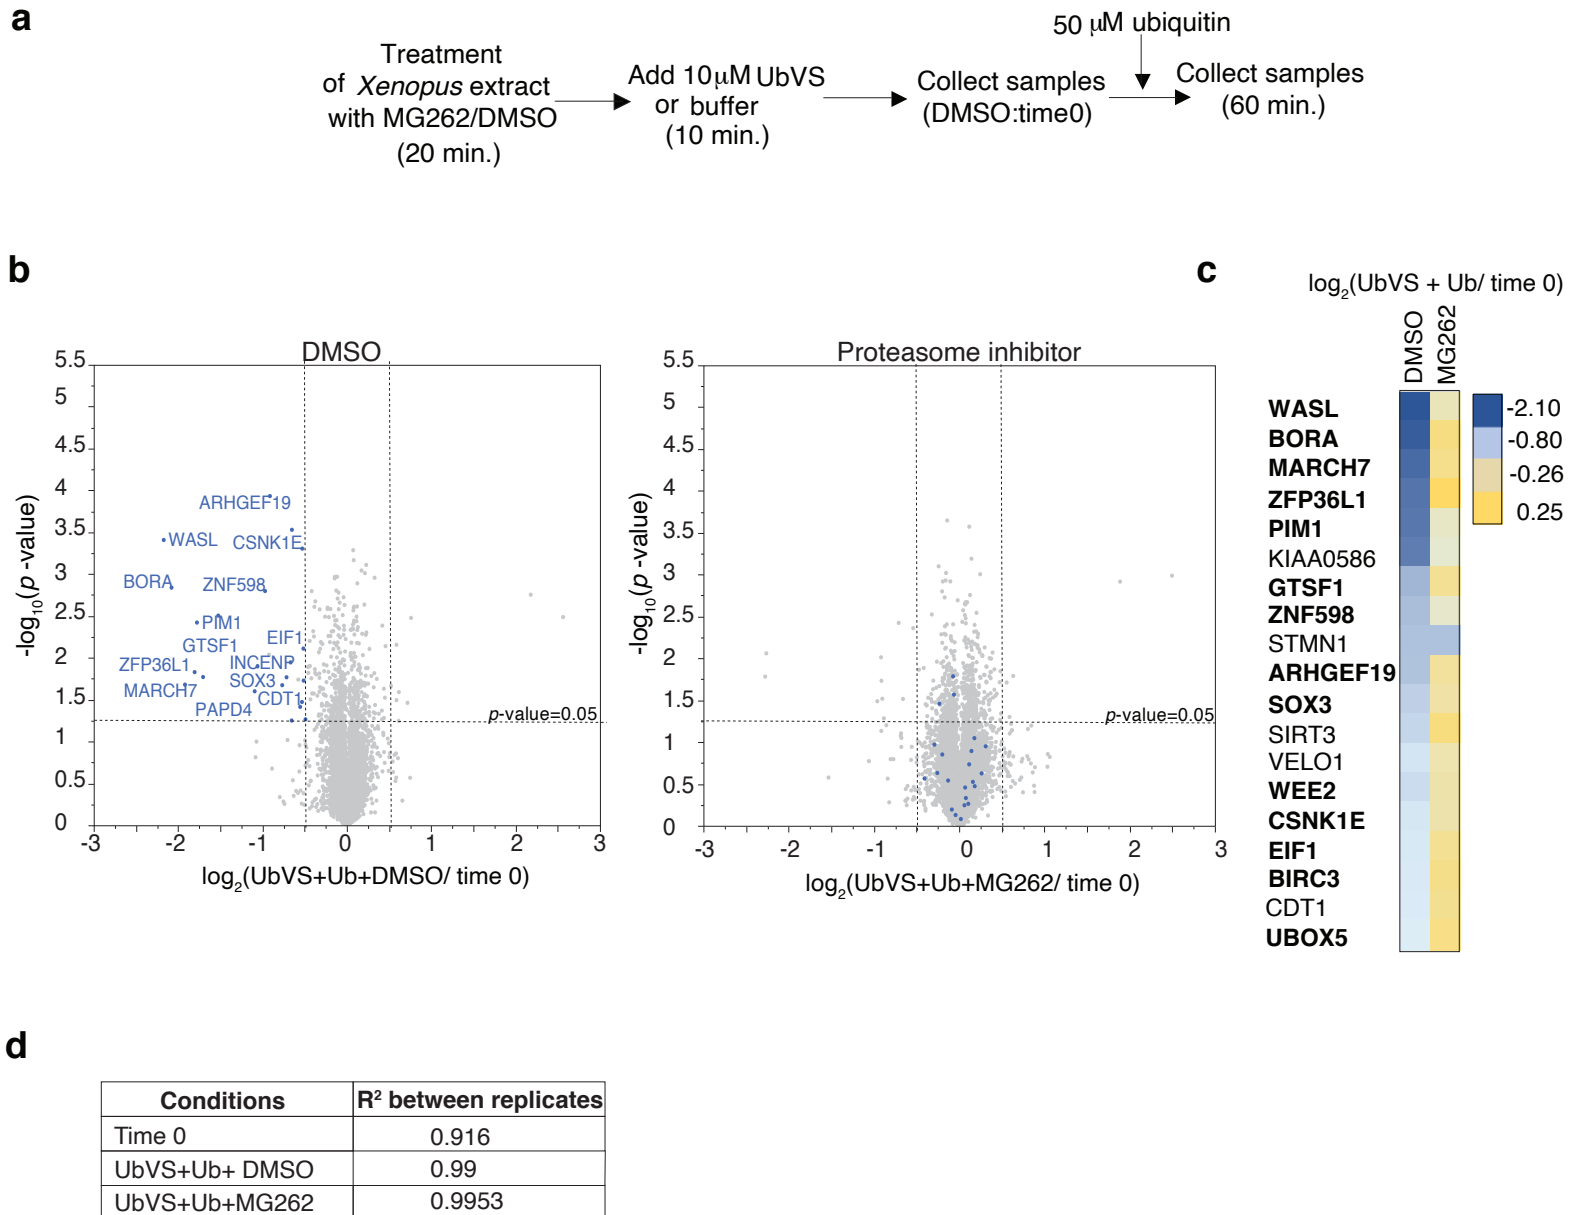

**Fig. S5 Degradation of proteins in UbVS/ubiquitin-treated extract is proteasome-dependent** (a) Extract was incubated with 200  $\mu$ M MG262 or DMSO (20 minutes), after which 10  $\mu$ M UbVS was added (10 minutes), followed by addition of 50  $\mu$ M of ubiquitin (time 0). Samples were collected in duplicate (time 0 and 60 minutes) and processed for mass spectrometry analysis by the SL-TMT method (b) Volcano plot of quantitative proteomics analysis comparing the proteins detected in UbVS/ubiquitin in presence of DMSO or MG262 at 60 minutes with the proteins detected at time 0. Statistical significance ( $-\log_{10} p\text{-value}$ ) is plotted against ratio (average  $\log_2$  ratio). Blue dots represent the proteins significantly decreasing in UbVS/ubiquitin and ubiquitin are labeled (c)  $\log_2$  ratio heat map of the proteins significantly downregulated in UbVS/ubiquitin. Proteins decreasing in the experiments in Fig.1G are in bold. (d) R<sup>2</sup> of the technical replicates of each condition.

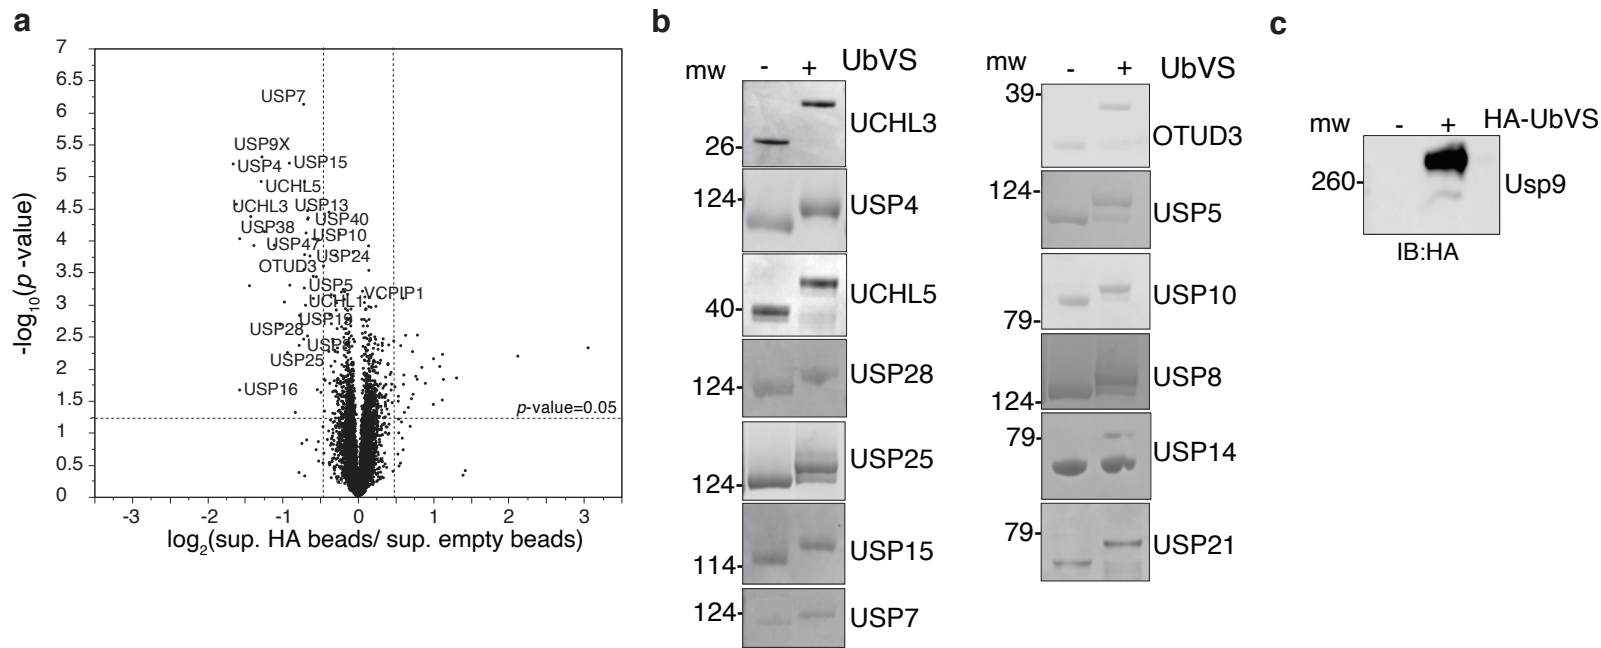



**a**

|       | Conc.(nM) |
|-------|-----------|
| Uchl3 | 1435      |
| Usp4  | 5.65      |
| Uchl5 | 600       |
| Usp9x | 73.99     |
| Usp28 | 3.44      |
| Usp15 | 21.48     |
| Usp25 | nd        |
| Usp7  | 150       |
| Otud3 | 8         |
| Usp5  | 550       |
| Usp10 | 200       |
| Usp8  | 70        |
| Usp14 | 425       |
| Usp21 | nd        |

**b**

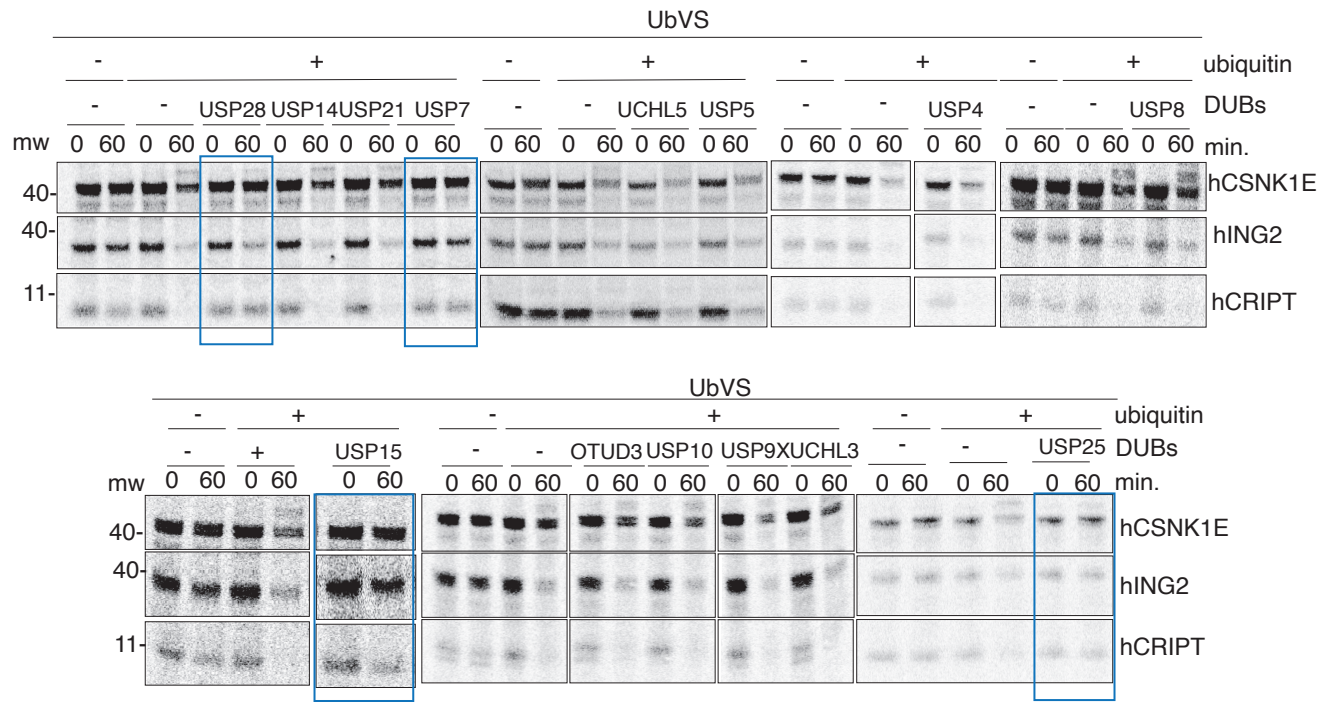

**c**

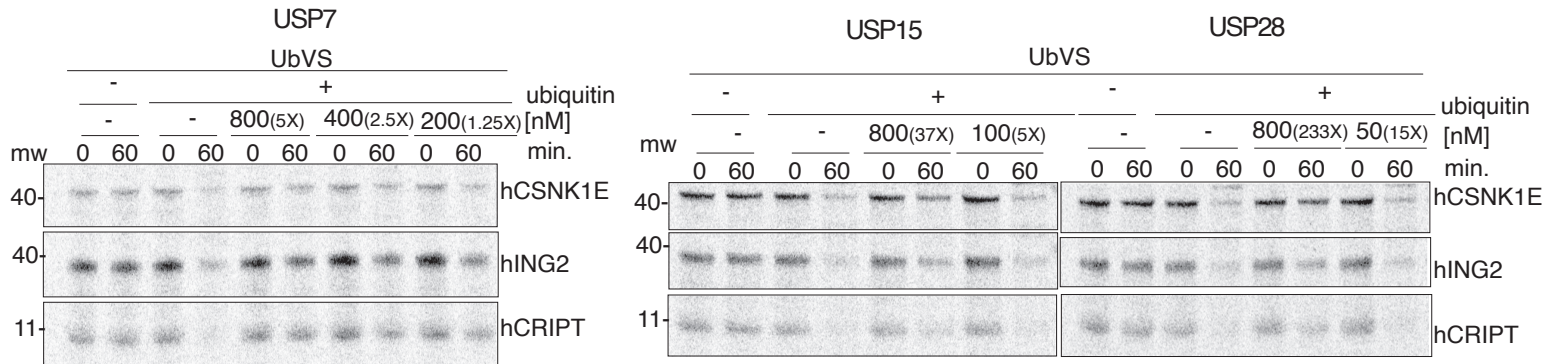

**d**

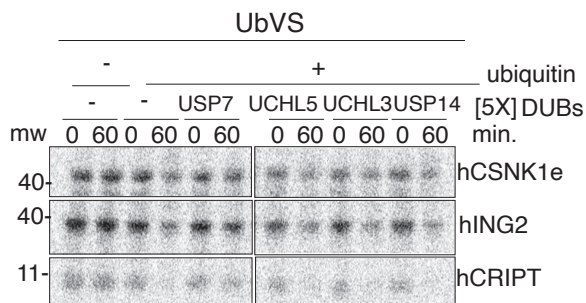

**Fig.S7. Experiments used to create the quantitative DUB activity profile (Fig.3).** (a) Estimated endogenous concentration of the DUBs tested (Fig.3a). One of the representative experiments reported in the quantitative profile in Fig.3b is shown in (b), in Fig.3c is shown in (c) and in Fig.3d is shown in (d). The blue rectangles in (a) indicate the four DUBs rescuing all the three substrates tested.

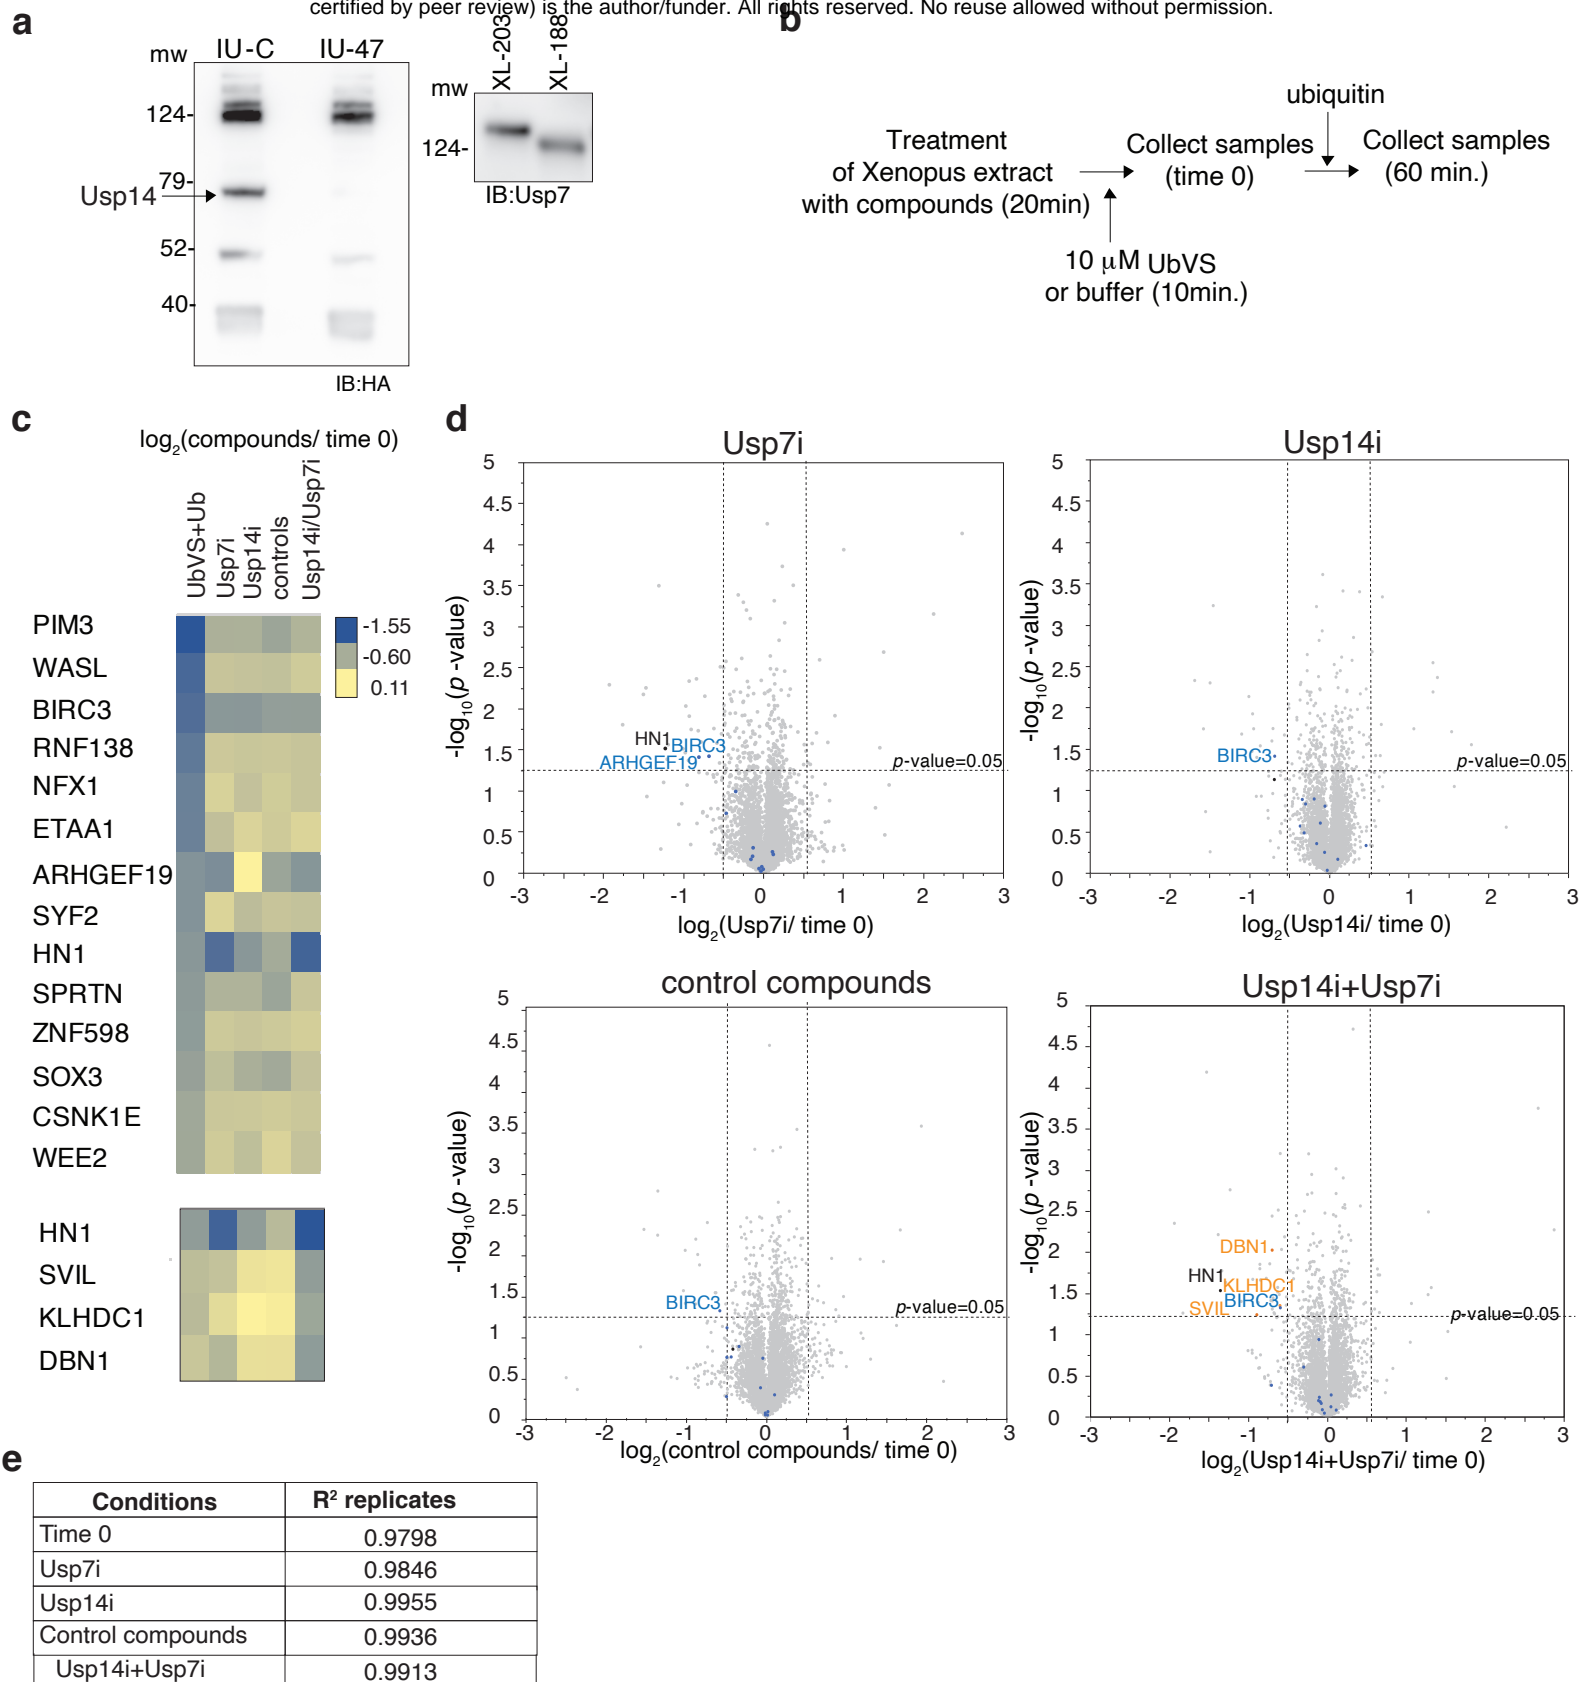

**Fig.S8 Usp7 or Usp14 inhibition does not promote broad protein instability** (a) Extract was incubated with the indicated compounds (20 minutes), followed by HA-UbVS addition (20 minutes). Aliquots were analyzed by immunoblotting. IU-47 and IU-C: Usp14 inhibitor (Usp14i) and control compound. XL-188 and XL-203: Usp7 inhibitor (Usp7i) and control compound. (b) Extract was incubated with DMSO or compounds. UbVS was added for 10 minutes (time 0) to the samples with DMSO. Ubiquitin was added to all samples, samples were collected in duplicate and analyzed by the SL-TMT method. (c) Top: heat map compares the effect of the specific DUB inhibitors on the proteins significantly decreasing in UbVS/ubiquitin in this experiment and in the experiments in Fig. 1F. Bottom: heat map of the proteins affected by the specific DUB inhibitors. (d) Volcano plot of quantitative proteomics analysis. Statistical significance ( $-\log_{10} p\text{-value}$ ) is plotted against ratio (average  $\log_2$  ratio). Blue dots: proteins decreasing in UbVS/ubiquitin; black dots: proteins decreasing in UbVS/ubiquitin and in presence of Usp7i; orange dots: proteins decreasing in presence of both the inhibitors. (e) R<sup>2</sup> of the technical replicates

**Table S1: List of the Xenopus DUBs**

| DUBs          | Estimated concentration (nM) | Class |                                             |
|---------------|------------------------------|-------|---------------------------------------------|
| CYLD          | 16                           | USP   | <b>n=35: UbVS-reactive</b>                  |
| USP4          | 5.65                         | USP   |                                             |
| USP5          | 546.4                        | USP   |                                             |
| USP7          | 146.9                        | USP   |                                             |
| USP8          | 46.2                         | USP   |                                             |
| USP9X         | 73.99                        | USP   |                                             |
| USP10         | 209                          | USP   |                                             |
| USP11         | 78                           | USP   |                                             |
| USP14         | 425                          | USP   |                                             |
| USP15         | 21.48                        | USP   |                                             |
| USP19         | 15.7                         | USP   |                                             |
| USP24         | 11.1                         | USP   |                                             |
| USP28         | 3.44                         | USP   |                                             |
| USP37         | 5.84                         | USP   |                                             |
| USP38         | 13.08                        | USP   |                                             |
| USP40         | 48.32                        | USP   |                                             |
| USP47         | 63.6                         | USP   |                                             |
| USP48         | 23                           | USP   |                                             |
| USP25         |                              | USP   |                                             |
| OTUB1         | 102                          | OTU   |                                             |
| OTUB2         | 42                           | OTU   |                                             |
| YOD1          | 66                           | OTU   |                                             |
| OTUD4         | 31.4                         | OTU   |                                             |
| OTUD3         | 8.11                         | OTU   |                                             |
| OTUD6B        | 53.5                         | OTU   |                                             |
| VCPIP1        | 53.6                         | OTU   |                                             |
| OTUD5         |                              | OTU   |                                             |
| OTUD7B        | 3.57                         | OTU   |                                             |
| UCHL1         | 2523                         | UCH   |                                             |
| UCHL3         | 1465                         | UCH   |                                             |
| UCHL5         | 600                          | UCH   |                                             |
| FAM188A       | 45                           | MINDY |                                             |
| FAM188B       | 2.8                          | MINDY |                                             |
| ATXN3         | 91.6                         | MJD   |                                             |
| ZUFSP         | 10.35                        | ZUFSP |                                             |
| USP1          | 5.96                         | USP   | <b>n=19 Expressed but not UbVS-reactive</b> |
| USP16         | 38.27                        | USP   |                                             |
| USP39 *       | 45.07                        | USP   |                                             |
| USP3          | 3.04                         | USP   |                                             |
| USP6          | 1.15                         | USP   |                                             |
| USP12         | 1.82                         | USP   |                                             |
| USP13         | 7.96                         | USP   |                                             |
| USP20         | 5.71                         | USP   |                                             |
| USP30         | 7.21                         | USP   |                                             |
| USP32         | 1.81                         | USP   |                                             |
| USP33         | 1.29                         | USP   |                                             |
| USP34         | 14.22                        | USP   |                                             |
| USP36         | 0.91                         | USP   |                                             |
| USP13         | 7.96                         | USP   |                                             |
| ALG13*        | 29.8                         | OTU   |                                             |
| FAM63A        | 28.6                         | MINDY |                                             |
| BRCC3         | 23.62                        | JAMM  |                                             |
| CSN5=cops     | 459.82                       | JAMM  |                                             |
| RPN11=PS      | 749.98                       | JAMM  |                                             |
| USP2          |                              | USP   | <b>n=43 Not detected or UbVS-reactive</b>   |
| USP9Y         |                              | USP   |                                             |
| USP17L2       |                              | USP   |                                             |
| USP18         |                              | USP   |                                             |
| USP21         |                              | USP   |                                             |
| USP22         |                              | USP   |                                             |
| USP26         |                              | USP   |                                             |
| USP27X        |                              | USP   |                                             |
| USP29         |                              | USP   |                                             |
| USP31         |                              | USP   |                                             |
| USP35         |                              | USP   |                                             |
| USP41         |                              | USP   |                                             |
| USP42         |                              | USP   |                                             |
| USP43         |                              | USP   |                                             |
| USP44         |                              | USP   |                                             |
| USP45         |                              | USP   |                                             |
| USP46         |                              | USP   |                                             |
| USP49         |                              | USP   |                                             |
| USP50 *       |                              | USP   |                                             |
| USP51         |                              | USP   |                                             |
| PAN2/USP52 *  |                              | USP   |                                             |
| USP53 *       |                              | USP   |                                             |
| USP54 *       |                              | USP   |                                             |
| BAP1          |                              | UCH   |                                             |
| ATXN3L        |                              | MJD   |                                             |
| JOSD1         |                              | MJD   |                                             |
| JOSD2         |                              | MJD   |                                             |
| H1N1L         |                              | OTU   |                                             |
| A20           |                              | OTU   |                                             |
| Cezanne 2     |                              | OTU   |                                             |
| FAM105A       |                              | OTU   |                                             |
| OTUD1         |                              | OTU   |                                             |
| OTUD5         |                              | OTU   |                                             |
| OTUD6A        |                              | OTU   |                                             |
| OTUD7A        |                              | OTU   |                                             |
| TNFAIP3       |                              | OTU   |                                             |
| OTU1          |                              | OTU   |                                             |
| ZRANB1=TRABID |                              | OTU   |                                             |
| AMSH          |                              | JAMM  |                                             |
| AMSH-LP       |                              | JAMM  |                                             |
| MPND          |                              | JAMM  |                                             |
| MYSM1         |                              | JAMM  |                                             |
| PRPF8*        |                              | JAMM  |                                             |

\*: probably inactive

JAMM=Metallo-protease DUBs

Concentration is based on Wuhr et al., 2014

**TableS2: HA-UbVS interactors**

| Protein    | Gene symbol | Gene Description                                        | Empty beads rep1 | Empty beads rep2 | Anti-HA beads rep1 | Anti-HA beads rep2 | NOTES                                                 |
|------------|-------------|---------------------------------------------------------|------------------|------------------|--------------------|--------------------|-------------------------------------------------------|
| CL492Conti | PSMC3       | 26S protease regulatory subunit 6A                      | 8                | 12               | 176                | 190                |                                                       |
| zeinaSsns  | PSMC5       | 26S protease regulatory subunit 8                       | 6                | 8                | 163                | 178                | DUBs                                                  |
| CL3721Cor  | PSMD2       | 26S proteasome non-ATPase regulatory subunit 2          | 3                | 4                | 148                | 150                | Proteasome, proteasome-associated proteins, ubiquitin |
| CL1906Cor  | PSMD11      | 26S proteasome non-ATPase regulatory subunit 11         | 5                | 7                | 139                | 151                |                                                       |
| CL2523Cor  | PSMD1       | 26S proteasome non-ATPase regulatory subunit 1          | 5                | 3                | 138                | 144                |                                                       |
| CL2720Cor  | USP5        | Ubiquitin carboxyl-terminal hydrolase 5                 | 5                | 2                | 130                | 146                |                                                       |
| CL4411Cor  | UCHL5       | Ubiquitin carboxyl-terminal hydrolase isozyme L5        | 2                | 2                | 112                | 128                |                                                       |
| TC4495B3   | UBC         | Polyubiquitin-C                                         | 2                | 3                | 109                | 84                 |                                                       |
| CL6Contig5 | USP7        | Ubiquitin carboxyl-terminal hydrolase 7                 | 2                | 1                | 101                | 113                |                                                       |
| CL5541Cor  | PSMC2       | 26S protease regulatory subunit 7                       | 6                | 5                | 97                 | 90                 |                                                       |
| CL2791Cor  | PSMC6       | 26S protease regulatory subunit 10B                     | 4                | 5                | 90                 | 105                |                                                       |
| zeinaSsns  | PSMC1       | 26S protease regulatory subunit 4                       | 7                | 6                | 82                 | 86                 |                                                       |
| CL4759Cor  | PSMD13      | 26S proteasome non-ATPase regulatory subunit 13         | 0                | 2                | 80                 | 80                 |                                                       |
| dsrrswaps  | USP14       | Ubiquitin carboxyl-terminal hydrolase 14                | 1                | 3                | 79                 | 79                 |                                                       |
| CL18578C   | UCHL1       | Ubiquitin carboxyl-terminal hydrolase isozyme L1        | 5                | 4                | 78                 | 87                 |                                                       |
| CL5907Cor  | PSMD12      | 26S proteasome non-ATPase regulatory subunit 12         | 2                | 3                | 76                 | 84                 |                                                       |
| CL2698Cor  | PSMD6       | 26S proteasome non-ATPase regulatory subunit 6          | 3                | 4                | 73                 | 71                 |                                                       |
| CL60Contig | PSMD3       | 26S proteasome non-ATPase regulatory subunit 3          | 6                | 5                | 73                 | 70                 |                                                       |
| CL2846Cor  | USP9X       | Probable ubiquitin carboxyl-terminal hydrolase FAF-X    | 0                | 0                | 63                 | 67                 |                                                       |
| CL1008Cor  | PSMC4       | 26S protease regulatory subunit 6B                      | 0                | 1                | 60                 | 66                 |                                                       |
| zeinaSsns  | USP47       | Ubiquitin carboxyl-terminal hydrolase                   | 0                | 0                | 60                 | 55                 |                                                       |
| TC426391   | UCHL3       | Ubiquitin carboxyl-terminal hydrolase isozyme L3        | 1                | 1                | 58                 | 75                 |                                                       |
| CL10383C   | USP28       | Ubiquitin carboxyl-terminal hydrolase 28                | 0                | 0                | 54                 | 48                 |                                                       |
| CL5540Cor  | PSMD14      | 26S proteasome non-ATPase regulatory subunit 14         | 3                | 5                | 53                 | 56                 |                                                       |
| CL2142Cor  | USP11       | Ubiquitin carboxyl-terminal hydrolase 11                | 0                | 0                | 49                 | 43                 |                                                       |
| CL2142Cor  | USP4        | Ubiquitin carboxyl-terminal hydrolase 4                 | 0                | 0                | 47                 | 38                 |                                                       |
| CL1100Cor  | PSMD4       | 26S proteasome non-ATPase regulatory subunit 4          | 2                | 3                | 42                 | 44                 |                                                       |
| CL5178Cor  | VCIPI1      | Deubiquitinating protein VCIPI135                       | 0                | 0                | 40                 | 40                 |                                                       |
| dsrrswaps  | USP40       | Ubiquitin carboxyl-terminal hydrolase 40                | 0                | 0                | 32                 | 42                 |                                                       |
| CL306Conti | PSMD8       | 26S proteasome non-ATPase regulatory subunit 8          | 0                | 1                | 31                 | 44                 |                                                       |
| dsrrswaps  | OTUD4       | OTU domain-containing protein 4                         | 0                | 0                | 30                 | 34                 |                                                       |
| CL4416Cor  | PSMB3       | Proteasome subunit beta type-3                          | 4                | 3                | 24                 | 22                 |                                                       |
| TC424927   | PSMA5       | Proteasome subunit alpha type-5                         | 0                | 1                | 23                 | 23                 |                                                       |
| TC423038   | OTUB1       | Ubiquitin thioesterase OTUB1                            | 0                | 0                | 22                 | 22                 |                                                       |
| CL7391Cor  | CYLD        | Ubiquitin carboxyl-terminal hydrolase CYLD              | 0                | 0                | 21                 | 18                 |                                                       |
| CL3942Cor  | USP15       | Ubiquitin carboxyl-terminal hydrolase                   | 0                | 0                | 20                 | 22                 |                                                       |
| CL150Conti | USP10       | Ubiquitin carboxyl-terminal hydrolase 10                | 0                | 0                | 20                 | 18                 |                                                       |
| CL3001Cor  | USP38       | Ubiquitin carboxyl-terminal hydrolase 38                | 0                | 0                | 20                 | 18                 |                                                       |
| CL4026Cor  | PSMA2       | Proteasome subunit alpha type-2                         | 2                | 2                | 19                 | 20                 |                                                       |
| CL3430Cor  | PSMA1       | Proteasome subunit alpha type-1                         | 0                | 0                | 19                 | 15                 |                                                       |
| dsrrswaps  | G3BP1       | Ras GTPase-activating protein-binding protein 1         | 0                | 0                | 18                 | 16                 | Usp10 regulator (Soncini et al., 2001)                |
| dsrrswaps  | YOD1        | Ubiquitin thioesterase OTU1                             | 0                | 0                | 17                 | 22                 |                                                       |
| CL6350Cor  | PSMD5       | 26S proteasome non-ATPase regulatory subunit 5          | 0                | 0                | 17                 | 20                 |                                                       |
| dsrrswaps  | ATXN3       | Ataxin 3 variant ref                                    | 0                | 0                | 17                 | 20                 |                                                       |
| CL6078Cor  | PSMA6       | Proteasome subunit alpha type-6                         | 0                | 4                | 16                 | 13                 |                                                       |
| CL3715Cor  | USP8        | Ubiquitin carboxyl-terminal hydrolase 8                 | 0                | 0                | 15                 | 20                 |                                                       |
| CL5195Cor  | UBE3A       | Ubiquitin-protein ligase E3A                            | 0                | 0                | 15                 | 19                 |                                                       |
| CL8846Cor  | PSMB4       | Proteasome subunit beta type-4                          | 1                | 2                | 14                 | 16                 |                                                       |
| CL6048Cor  | PSMA4       | Proteasome subunit alpha type-4                         | 0                | 0                | 14                 | 13                 |                                                       |
| CL362Conti | USP24       | Ubiquitin carboxyl-terminal hydrolase 24                | 0                | 0                | 14                 | 13                 |                                                       |
| CL5308Cor  | PSMB7       | Proteasome subunit beta type                            | 0                | 0                | 14                 | 8                  |                                                       |
| CL6056Cor  | RNF216      | E3 ubiquitin-protein ligase RNF216                      | 0                | 0                | 12                 | 11                 |                                                       |
| CL4431Cor  | ADRM1       | Proteasomal ubiquitin receptor ADRM1                    | 0                | 0                | 12                 | 8                  |                                                       |
| CL4421Cor  | OTUD6B      | OTU domain-containing protein 6B                        | 0                | 0                | 11                 | 8                  |                                                       |
| zeinaSsns  | G3BP2       | Ras GTPase-activating protein-binding protein 2         | 1                | 0                | 10                 | 12                 | Usp10 regulator (Soncini et al., 2001)                |
| CL6932Cor  | TXNL1       | Thioredoxin-like protein 1                              | 0                | 0                | 9                  | 6                  | Proteasome associated protein                         |
| TC414297   | USP25       | Ubiquitin carboxyl-terminal hydrolase 25                | 0                | 0                | 8                  | 9                  |                                                       |
| CL7369Cor  | USP48       | Ubiquitin carboxyl-terminal hydrolase 48                | 0                | 0                | 7                  | 10                 |                                                       |
| CL1858Cor  | USP19       | Ubiquitin carboxyl-terminal hydrolase (Fragment)        | 0                | 0                | 7                  | 7                  |                                                       |
| dsrrswaps  | OTUB2       | Ubiquitin thioesterase OTUB2                            | 0                | 0                | 7                  | 5                  |                                                       |
| CL5807Cor  | SENp8       | Sentrin-specific protease 8                             | 0                | 0                | 6                  | 9                  | UbVS target                                           |
| CL947Conti | FAM188A     | Protein FAM188A                                         | 0                | 0                | 6                  | 6                  |                                                       |
| CL3708Cor  | RNF213      | E3 ubiquitin-protein ligase RNF213                      | 0                | 0                | 6                  | 4                  |                                                       |
| CL2263Cor  | UBE3C       | Ubiquitin-protein ligase E3C                            | 0                | 0                | 6                  | 4                  | UbVS target                                           |
| CL11640C   | ULK3        | Serine/threonine-protein kinase ULK3                    | 0                | 0                | 6                  | 4                  |                                                       |
| CL4995Cor  | OTUD3       | OTU domain-containing protein 3                         | 0                | 0                | 6                  | 3                  |                                                       |
| zeinaSsns  | ACTN1       | Alpha-actinin-1                                         | 0                | 0                | 5                  | 7                  |                                                       |
| CL8177Cor  | LMNA        | Prelamin-A/C                                            | 0                | 0                | 5                  | 5                  |                                                       |
| CL10519C   | METTL18     | Histidine protein methyltransferase 1 homolog           | 0                | 0                | 5                  | 5                  |                                                       |
| zeinaSsns  | DYNC1L1     | Cytoplasmic dynein 1 light intermediate chain 1         | 0                | 0                | 5                  | 2                  |                                                       |
| TC432167   | PSMB7       | Proteasome subunit beta type-7                          | 0                | 0                | 4                  | 5                  |                                                       |
| CL12340C   | PSMD10      | 26S proteasome non-ATPase regulatory subunit 10         | 0                | 0                | 4                  | 5                  |                                                       |
| CL2481Cor  | USP37       | Ubiquitin carboxyl-terminal hydrolase 37                | 0                | 0                | 4                  | 3                  |                                                       |
| zeinaSsns  | ADPRHL2     | Poly(ADP-ribose) glycohydrolase AFR13                   | 0                | 0                | 4                  | 2                  |                                                       |
| CL8288Cor  | FAM188B     | Protein FAM188B                                         | 0                | 0                | 3                  | 5                  |                                                       |
| CL1734Cor  | DRG2        | Developmentally-regulated GTP-binding protein 2         | 0                | 0                | 3                  | 4                  |                                                       |
| CL11278C   | ZUFSP       | Zinc finger with UFM1-specific peptidase domain protein | 0                | 0                | 3                  | 3                  |                                                       |
| CL391Conti | RPL18A      | 60S ribosomal protein L18a                              | 0                | 0                | 3                  | 3                  |                                                       |
| TC464126   | HNRNPC      | Heterogeneous nuclear ribonucleoproteins C1/C2          | 0                | 0                | 3                  | 2                  |                                                       |
| dsrrswaps  | ZFYVE16     | Zinc finger FYVE domain-containing protein 16           | 0                | 0                | 2                  | 3                  |                                                       |
| zeinaSsns  | OTUD5       | OTU domain containing 5, isoform CRA_c                  | 0                | 0                | 2                  | 2                  |                                                       |
| CL20Contig | ACTR2       | Actin-related protein 2                                 | 0                | 0                | 2                  | 2                  |                                                       |
| CL99Contig | PLEC        | Plectin                                                 | 0                | 0                | 2                  | 2                  |                                                       |
| dsrrswaps  | RNF14       | E3 ubiquitin-protein ligase RNF14 (Fragment)            | 0                | 0                | 2                  | 2                  |                                                       |
| CL752Conti | SPATA2L     | Spermatogenesis-associated protein 2-like protein       | 0                | 0                | 2                  | 2                  | CYLD interactor (Sowa et al., 2009)                   |
| CL871Conti | VIM         | Vimentin                                                | 0                | 0                | 2                  | 2                  |                                                       |
| dsrrswaps  | SPATA2      | Spermatogenesis-associated protein 2                    | 0                | 0                | 1                  | 2                  | CYLD interactor (Sowa et al., 2009)                   |
| CL12666C   | OTUD7B      | OTU domain-containing protein 7B                        | 0                | 0                | 1                  | 1                  |                                                       |

rep:replicate

**Selection of the interactors**

Proteins are present in both replicates of the anti-HA beads and if present on empty beads they should be enriched at least 6 fold on the anti-HA beads

If multiple isoforms were present, only the isoform with more peptides is reported (for simplicity)

UbVS target are based on Hewings et al., 2018

**TableS3: UbVS-sensitive proteolytic DUB substrates**

| Substrates | Function                              | Unstructured regions                   | PEST sequence (number) | UPS reported substrate | DUBs reported substrate                                     |
|------------|---------------------------------------|----------------------------------------|------------------------|------------------------|-------------------------------------------------------------|
| NFX1       | E3                                    | N-term and C-term                      |                        |                        | USP9                                                        |
| MARCH 7    | E3                                    | highly disordered                      |                        | YES                    | USP7/USP9                                                   |
| MKRN1      | E3                                    | N-term and multiple regions            |                        |                        |                                                             |
| FAM32A     | Putative mRNA binding protein         | highly disordered                      |                        |                        |                                                             |
| RNASEH1    | Endonuclease                          | C-term                                 |                        |                        |                                                             |
| PIM3       | Kinase                                | C-term                                 | YES                    | YES                    | USP7 is reported to act on the homolog PIM2                 |
| CRIP1      | Cytoskeleton binding protein          | C-term                                 |                        |                        |                                                             |
| WASL       | Actin binding protein                 | highly disordered                      | YES                    | YES                    | USP7 is reported to act on a member of the same family WASH |
| KIAA1430   | Cilia and flagella associated protein | highly disordered                      | YES (2)                |                        |                                                             |
| RBM18      | Probable RNA binding protein          | C-term                                 |                        |                        |                                                             |
| HN1        | Microtubule associated protein        | highly disordered                      | YES                    |                        |                                                             |
| RNF138     | E3                                    | N-term and C-term                      |                        | YES                    |                                                             |
| GTSF1      | Transcriptional repressor             | N-term and C-term                      | YES (2)                |                        |                                                             |
| SYF2       | Pre-mrna splicing factor              | highly disordered                      |                        |                        |                                                             |
| ZNF598     | E3                                    | big disordered region in the center    | YES                    |                        |                                                             |
| ARHGEF19   | Rho guanine nucleotide exchangein     | N-term and C-term                      |                        |                        |                                                             |
| ZMAT2      | Spliceosome component                 | N-term and C-term                      |                        |                        |                                                             |
| BORA       | Kinase activator                      | N-term and C-term                      |                        | YES                    |                                                             |
| SOX3       | Transcription factor                  | N-term and C-term                      | YES                    |                        |                                                             |
| CSNK1E     | Kinase                                | N-term and C-term                      |                        |                        |                                                             |
| SOX15      | Transcription factor                  | N-term and C-term                      |                        |                        |                                                             |
| ZFP36L1    | mRNA binding protein                  | highly disordered                      | YES                    |                        |                                                             |
| BIRC3      | E3                                    | mostly ordered                         |                        | YES                    | USP19                                                       |
| EIF1       | Translation initiation factor         | N-term and C-term                      |                        |                        |                                                             |
| UBOX5      | Hypotetical E3 (for similarity)       | multiple disordered regions            |                        |                        |                                                             |
| ETAA1      | DNA damage associated protein         | c-term                                 |                        |                        |                                                             |
| SPRTN      | DNA damage associated protein         | multiple disordered regions            |                        | YES                    |                                                             |
| WEE2       | Kinase                                | N-term                                 | YES                    |                        |                                                             |
| PLIN2      | Lipid storage                         | N-term and C-term                      |                        | YES                    |                                                             |
| STAM       | Signal transducing adapter            | multiple disordered regions and C-term |                        | YES                    | USP8                                                        |
| PLK3       | Kinase                                | N-terminal and small C-term            | YES                    | YES                    |                                                             |
| TGIF2      | Transcription factor                  | multiple disordered regions            | YES                    |                        |                                                             |
| C6ORF132   | Uncharacterized protein               | highly disordered                      | YES (5)                |                        |                                                             |
| GIGYF1     | GRB10 interactor protein              | multiple disordered regions            | YES (2)                |                        |                                                             |
